# Supplementary material for: Navigating the unexpected: The impact of disruptive events on mitigation scenarios
Source: Research Square preprint supplement (doi:10.21203/rs.3.rs-7427967/v1), 2025-08-29
Supplement: Supplementary file 1 [file 8e5479912666cb1ba9d9b372.xlsx]

## Sheet: HD-ER (DERP 2 Eroded R..
Estimates: projections for change in final energy (i.e. climate-adjusted cooling energy demand), for residential and commercial
Characteristics
Emissions based on scenarios: NDC-EI (which is akin to the papers CurPol 3.31C scenario)
Percentile: 95th to capture cascading failure part of the DERP2 narrative
Access to ACs: as projected under SSP2, i.e. default setting
Set point: 23C
https://iopscience.iop.org/article/10.1088/2753-3751/ad6f11
	access_scenario	scenario	name_run	q	region	year	e_cool_CC	e_cool_noCC	e_cool_delta	Percentage change
	projected	EN_NPi2100	tm23ts23	0.95	AFR	2030	0.15874338946965352	0.12955947592735248	0.029183913542301043	0.225255
	projected	EN_NPi2100	tm23ts23	0.95	AFR	2040	0.30784958025045234	0.23335318266578942	0.0744964	0.319243
	projected	EN_NPi2100	tm23ts23	0.95	AFR	2050	0.6449304554988374	0.45404457017902267	0.19088588531981476	0.420412
	projected	EN_NPi2100	tm23ts23	0.95	AFR	2060	1.6050876106022653	1.0464367362539424	0.558651	0.53386
	projected	EN_NPi2100	tm23ts23	0.95	AFR	2070	4.1030034182077735	2.482990891784437	1.6200125264233365	0.652444
	projected	EN_NPi2100	tm23ts23	0.95	AFR	2080	8.126041632553983	4.5800984616991425	3.545943170854841	0.774207
	projected	EN_NPi2100	tm23ts23	0.95	AFR	2090	12.080123338449688	6.346675364325834	5.733447974123854	0.903378
	projected	EN_NPi2100	tm23ts23	0.95	AFR	2100	14.40963700859754	7.062628748612808	7.347008259984732	1.04027
	projected	EN_NPi2100	tm23ts23	0.95	CPA	2030	0.5553325398075196	0.42313576228877214	0.13219677751874748	0.312422
	projected	EN_NPi2100	tm23ts23	0.95	CPA	2040	0.6362801814559162	0.44371406980488315	0.1925661116510331	0.433987
	projected	EN_NPi2100	tm23ts23	0.95	CPA	2050	0.7042970616106113	0.4517253506298455	0.25257171098076586	0.559127
	projected	EN_NPi2100	tm23ts23	0.95	CPA	2060	0.7312127309937486	0.43182407993916405	0.29938865105458456	0.693312
	projected	EN_NPi2100	tm23ts23	0.95	CPA	2070	0.7298703998237599	0.3983081032284872	0.3315622965952727	0.832427
	projected	EN_NPi2100	tm23ts23	0.95	CPA	2080	0.7092188121358235	0.35857552704295326	0.35064328509287024	0.977878
	projected	EN_NPi2100	tm23ts23	0.95	CPA	2090	0.6781063413542359	0.31767685130141265	0.3604294900528232	1.13458
	projected	EN_NPi2100	tm23ts23	0.95	CPA	2100	0.6459714896751818	0.28071416971024227	0.36525731996493954	1.30117
	projected	EN_NPi2100	tm23ts23	0.95	EEU	2030	0.3861326360919951	0.258792	0.1273406127401001	0.492058
	projected	EN_NPi2100	tm23ts23	0.95	EEU	2040	0.4979420672784872	0.27432382697000224	0.22361824030848498	0.815162
	projected	EN_NPi2100	tm23ts23	0.95	EEU	2050	0.5699618107141365	0.2644673394269771	0.30549447128715945	1.15513
	projected	EN_NPi2100	tm23ts23	0.95	EEU	2060	0.6392975226877528	0.25334356530119745	0.3859539573865553	1.52344
	projected	EN_NPi2100	tm23ts23	0.95	EEU	2070	0.6794058323952992	0.23343983613613173	0.44596599625916744	1.91041
	projected	EN_NPi2100	tm23ts23	0.95	EEU	2080	0.7016142345114481	0.2112589724571328	0.49035526205431534	2.32111
	projected	EN_NPi2100	tm23ts23	0.95	EEU	2090	0.7164866709327345	0.1901340031152314	0.5263526678175031	2.76832
	projected	EN_NPi2100	tm23ts23	0.95	EEU	2100	0.7273314627862677	0.17105295215201186	0.5562785106342558	3.25208
	projected	EN_NPi2100	tm23ts23	0.95	FSU	2030	0.19022738408949333	0.134694	0.0555334	0.412293
	projected	EN_NPi2100	tm23ts23	0.95	FSU	2040	0.268344	0.16832477767267753	0.10001892721346148	0.594202
	projected	EN_NPi2100	tm23ts23	0.95	FSU	2050	0.3236153632761528	0.1805611065929994	0.1430542566831534	0.792276
	projected	EN_NPi2100	tm23ts23	0.95	FSU	2060	0.37254197394784344	0.18477746933407876	0.18776450461376468	1.01617
	projected	EN_NPi2100	tm23ts23	0.95	FSU	2070	0.41192757136291924	0.1826998880344396	0.22922768332847965	1.25467
	projected	EN_NPi2100	tm23ts23	0.95	FSU	2080	0.44124712009962286	0.17580872185101043	0.26543839824861243	1.50981
	projected	EN_NPi2100	tm23ts23	0.95	FSU	2090	0.4607254056902379	0.16546842151929023	0.2952569841709477	1.78437
	projected	EN_NPi2100	tm23ts23	0.95	FSU	2100	0.4740915890771958	0.15429256147398165	0.3197990276032141	2.07268
	projected	EN_NPi2100	tm23ts23	0.95	LAM	2030	2.2928053328627307	1.831258133226374	0.4615471996363567	0.252038
	projected	EN_NPi2100	tm23ts23	0.95	LAM	2040	4.000031395545233	2.9141548898548937	1.0858765056903392	0.372621
	projected	EN_NPi2100	tm23ts23	0.95	LAM	2050	5.375545739204746	3.5781663916548867	1.7973793475498594	0.502319
	projected	EN_NPi2100	tm23ts23	0.95	LAM	2060	6.464141294718244	3.9369966030844186	2.5271446916338256	0.641897
	projected	EN_NPi2100	tm23ts23	0.95	LAM	2070	7.14232	3.9827715670145256	3.159553153159944	0.793305
	projected	EN_NPi2100	tm23ts23	0.95	LAM	2080	7.489434191594913	3.8352699885958734	3.65416	0.952779
	projected	EN_NPi2100	tm23ts23	0.95	LAM	2090	7.622304518817505	3.587277971339409	4.035026547478096	1.12482
	projected	EN_NPi2100	tm23ts23	0.95	LAM	2100	7.676119646851092	3.3233868279201966	4.352732818930895	1.30973
	projected	EN_NPi2100	tm23ts23	0.95	MEA	2030	1.3016046902689729	1.0898147309152664	0.21178995935370648	0.194336
	projected	EN_NPi2100	tm23ts23	0.95	MEA	2040	2.0506411252119863	1.631471246327814	0.41916987888417223	0.256928
	projected	EN_NPi2100	tm23ts23	0.95	MEA	2050	2.875553275771117	2.1596244123548574	0.7159288634162597	0.331506
	projected	EN_NPi2100	tm23ts23	0.95	MEA	2060	3.7600086527562038	2.6605220753993617	1.099486577356842	0.41326
	projected	EN_NPi2100	tm23ts23	0.95	MEA	2070	4.641250561607727	3.0944386390752916	1.5468119225324353	0.499868
	projected	EN_NPi2100	tm23ts23	0.95	MEA	2080	5.383545644364177	3.379331488334655	2.004214156029522	0.59308
	projected	EN_NPi2100	tm23ts23	0.95	MEA	2090	5.917516674844475	3.486409264698131	2.4311074101463443	0.69731
	projected	EN_NPi2100	tm23ts23	0.95	MEA	2100	6.206086690423698	3.423125957939081	2.7829607324846166	0.812988
	projected	EN_NPi2100	tm23ts23	0.95	NAM	2030	1.0350013727330625	0.7506140167913644	0.28438735594169806	0.378873
	projected	EN_NPi2100	tm23ts23	0.95	NAM	2040	1.1387319578068864	0.7271866458484558	0.4115453119584306	0.565942
	projected	EN_NPi2100	tm23ts23	0.95	NAM	2050	1.2355106861241398	0.7007058287000599	0.5348048574240799	0.763237
	projected	EN_NPi2100	tm23ts23	0.95	NAM	2060	1.3369318602429405	0.6762011567051415	0.6607307035377991	0.977122
	projected	EN_NPi2100	tm23ts23	0.95	NAM	2070	1.4351110081257346	0.6533317890089793	0.7817792191167553	1.1966
	projected	EN_NPi2100	tm23ts23	0.95	NAM	2080	1.522069885694528	0.6275123411252966	0.8945575445692314	1.42556
	projected	EN_NPi2100	tm23ts23	0.95	NAM	2090	1.5985284624069636	0.5988706960926078	0.9996577663143558	1.66924
	projected	EN_NPi2100	tm23ts23	0.95	NAM	2100	1.6655710776670425	0.5692917122449541	1.0962793654220884	1.92569
	projected	EN_NPi2100	tm23ts23	0.95	PAO	2030	0.2544931620848022	0.18993984712730472	0.0645533	0.339862
	projected	EN_NPi2100	tm23ts23	0.95	PAO	2040	0.2687216116208127	0.1812746108335783	0.087447	0.482401
	projected	EN_NPi2100	tm23ts23	0.95	PAO	2050	0.27592828127187724	0.16886273126512336	0.10706555000675388	0.634039
	projected	EN_NPi2100	tm23ts23	0.95	PAO	2060	0.27950502578613057	0.15537127357969516	0.12413375220643541	0.798949
	projected	EN_NPi2100	tm23ts23	0.95	PAO	2070	0.2785738848256028	0.14117701903772267	0.13739686578788013	0.973224
	projected	EN_NPi2100	tm23ts23	0.95	PAO	2080	0.2748640641132681	0.12737851744525394	0.14748554666801414	1.15785
	projected	EN_NPi2100	tm23ts23	0.95	PAO	2090	0.26918029895313955	0.11423116710137544	0.15494913185176412	1.35645
	projected	EN_NPi2100	tm23ts23	0.95	PAO	2100	0.26191659498536496	0.10196273901091576	0.1599538559744492	1.56875
	projected	EN_NPi2100	tm23ts23	0.95	PAS	2030	1.0897366734264562	0.912633	0.17710381550443222	0.194058
	projected	EN_NPi2100	tm23ts23	0.95	PAS	2040	1.861571341343997	1.4885353167927713	0.37303602455122564	0.250606
	projected	EN_NPi2100	tm23ts23	0.95	PAS	2050	2.7309037193135905	2.080989847355693	0.6499138719578976	0.31231
	projected	EN_NPi2100	tm23ts23	0.95	PAS	2060	3.3804654417821034	2.44722	0.9332408215016934	0.381347
	projected	EN_NPi2100	tm23ts23	0.95	PAS	2070	3.7205835235251588	2.56091	1.1596728531828187	0.452836
	projected	EN_NPi2100	tm23ts23	0.95	PAS	2080	4.090782130753305	2.675757048314298	1.4150250824390072	0.528832
	projected	EN_NPi2100	tm23ts23	0.95	PAS	2090	4.315905498644603	2.676078909595792	1.6398265890488108	0.612772
	projected	EN_NPi2100	tm23ts23	0.95	PAS	2100	4.34111	2.5498506382136132	1.7912590662790868	0.702496
	projected	EN_NPi2100	tm23ts23	0.95	SAS	2030	1.6251235499015197	1.4743730866414086	0.1507504632601111	0.102247
	projected	EN_NPi2100	tm23ts23	0.95	SAS	2040	2.834746195801962	2.4365422016850404	0.39820399411692176	0.16343
	projected	EN_NPi2100	tm23ts23	0.95	SAS	2050	5.4135971147760245	4.411296863577287	1.0023002511987373	0.227212
	projected	EN_NPi2100	tm23ts23	0.95	SAS	2060	8.969436883386498	6.92115	2.048286856741808	0.295946
	projected	EN_NPi2100	tm23ts23	0.95	SAS	2070	12.47070669433273	9.11319	3.3575196867581205	0.368424
	projected	EN_NPi2100	tm23ts23	0.95	SAS	2080	15.02354035855314	10.398388012754047	4.625152345799092	0.444795
	projected	EN_NPi2100	tm23ts23	0.95	SAS	2090	16.202332647666413	10.609499492811205	5.592833154855208	0.527153
	projected	EN_NPi2100	tm23ts23	0.95	SAS	2100	16.41826777743928	10.164984537647214	6.253283239792065	0.615179
	projected	EN_NPi2100	tm23ts23	0.95	WEU	2030	1.836628820857139	1.3569590782746273	0.4796697425825118	0.353489
	projected	EN_NPi2100	tm23ts23	0.95	WEU	2040	2.20866	1.4083900100205893	0.8002726627785408	0.568218
	projected	EN_NPi2100	tm23ts23	0.95	WEU	2050	2.455325761875507	1.36726	1.088064940763287	0.795799
	projected	EN_NPi2100	tm23ts23	0.95	WEU	2060	2.6488355112413635	1.2934210318646469	1.3554144793767167	1.04793
	projected	EN_NPi2100	tm23ts23	0.95	WEU	2070	2.784440019257682	1.20081	1.5836301751141322	1.3188
	projected	EN_NPi2100	tm23ts23	0.95	WEU	2080	2.884505426471472	1.104973175148609	1.7795322513228629	1.61048
	projected	EN_NPi2100	tm23ts23	0.95	WEU	2090	2.966342961816673	1.0134404561412926	1.9529025056753804	1.927
	projected	EN_NPi2100	tm23ts23	0.95	WEU	2100	3.0216362852421197	0.924594	2.097042059562762	2.26807

## Sheet: HD-Inc (DERP 4 Incremental R..
Estimates: projections for change in final energy (i.e. climate-adjusted cooling energy demand), for residential and commercial
Characteristics
Emissions based on scenarios: NDC-EI (which is akin to the papers CurPol 3.31C scenario)
Percentile: 50th
Access to ACs: Universal by 2050, to capture the incremental part of DERP4 narrative
Set point: 23C
https://iopscience.iop.org/article/10.1088/2753-3751/ad6f11
	access_scenario	scenario	name_run	q	region	year	e_cool_CC	e_cool_noCC	e_cool_delta	Percentage change
	DLS	EN_NPi2100	tm23ts23	0.5	AFR	2030	0.3127606575494779	0.2849119791098773	0.027848678439600594	0.0977448
	DLS	EN_NPi2100	tm23ts23	0.5	AFR	2040	0.7226102231035694	0.6230118421449568	0.0995984	0.159866
	DLS	EN_NPi2100	tm23ts23	0.5	AFR	2050	1.3820475294337826	1.1264933789106615	0.25555415052312114	0.226858
	DLS	EN_NPi2100	tm23ts23	0.5	AFR	2060	2.2238777598107538	1.7059541547644759	0.5179236050462779	0.303598
	DLS	EN_NPi2100	tm23ts23	0.5	AFR	2070	4.23621	3.0585599582919256	1.177650815724184	0.385034
	DLS	EN_NPi2100	tm23ts23	0.5	AFR	2080	7.37044	5.017465541240379	2.3529775342763903	0.468957
	DLS	EN_NPi2100	tm23ts23	0.5	AFR	2090	10.303167929077809	6.612278586902837	3.6908893421749713	0.558187
	DLS	EN_NPi2100	tm23ts23	0.5	AFR	2100	11.880366901308175	7.1875748054490565	4.692792095859119	0.652903
	DLS	EN_NPi2100	tm23ts23	0.5	CPA	2030	0.5023760090753786	0.45138896192645517	0.050987	0.112956
	DLS	EN_NPi2100	tm23ts23	0.5	CPA	2040	0.5963574353414175	0.5113736818689771	0.0849838	0.166187
	DLS	EN_NPi2100	tm23ts23	0.5	CPA	2050	0.6623490318179849	0.5423933196819661	0.11995571213601874	0.22116
	DLS	EN_NPi2100	tm23ts23	0.5	CPA	2060	0.6375689853147231	0.49769907607888003	0.13986990923584303	0.281033
	DLS	EN_NPi2100	tm23ts23	0.5	CPA	2070	0.600223	0.4466691660519546	0.15355367733658642	#VALUE!
	DLS	EN_NPi2100	tm23ts23	0.5	CPA	2080	0.5571114776152937	0.39509627089101235	0.16201520672428132	0.410065
	DLS	EN_NPi2100	tm23ts23	0.5	CPA	2090	0.5131648016138225	0.3461633971438893	0.16700140446993322	0.482435
	DLS	EN_NPi2100	tm23ts23	0.5	CPA	2100	0.4744068246790809	0.30410973931432556	0.17029708536475535	0.559986
	DLS	EN_NPi2100	tm23ts23	0.5	EEU	2030	0.2734715415226992	0.26335783609531055	0.010113705427388653	#VALUE!
	DLS	EN_NPi2100	tm23ts23	0.5	EEU	2040	0.33478717450237944	0.28396307446127944	0.050824100041099995	#VALUE!
	DLS	EN_NPi2100	tm23ts23	0.5	EEU	2050	0.37064073853459406	0.2792321821460495	0.0914086	0.327357
	DLS	EN_NPi2100	tm23ts23	0.5	EEU	2060	0.396105	0.2662151302950456	0.1298895630847144	0.487912
	DLS	EN_NPi2100	tm23ts23	0.5	EEU	2070	0.40523843523273684	0.2446699244594733	0.16056851077326353	0.656266
	DLS	EN_NPi2100	tm23ts23	0.5	EEU	2080	0.4057807819615705	0.2211415745755168	0.18463920738605372	0.834937
	DLS	EN_NPi2100	tm23ts23	0.5	EEU	2090	0.4038472096698573	0.1989574532230033	0.20488975644685403	1.02982
	DLS	EN_NPi2100	tm23ts23	0.5	EEU	2100	0.40112	0.1790073602175342	0.22211312237819084	1.2408
	DLS	EN_NPi2100	tm23ts23	0.5	FSU	2030	0.15778588174671265	0.14705413301816106	0.010731748728551593	0.0729782
	DLS	EN_NPi2100	tm23ts23	0.5	FSU	2040	0.2233019352322211	0.194627	0.028675170280936108	0.147334
	DLS	EN_NPi2100	tm23ts23	0.5	FSU	2050	0.2771552398041714	0.2248560444862795	0.0522992	0.23259
	DLS	EN_NPi2100	tm23ts23	0.5	FSU	2060	0.2998253421133032	0.22512473495571075	0.0747006	0.331819
	DLS	EN_NPi2100	tm23ts23	0.5	FSU	2070	0.31516359343671285	0.21912081398045558	0.0960428	0.43831
	DLS	EN_NPi2100	tm23ts23	0.5	FSU	2080	0.32343838022410665	0.20831662714213733	0.11512175308196931	0.552629
	DLS	EN_NPi2100	tm23ts23	0.5	FSU	2090	0.32623424844933785	0.1947227737693871	0.13151147467995075	0.675378
	DLS	EN_NPi2100	tm23ts23	0.5	FSU	2100	0.32618098952425034	0.18087933532865555	0.1453016541955948	0.803307
	DLS	EN_NPi2100	tm23ts23	0.5	LAM	2030	2.120969546671934	1.9395096791038586	0.18145986756807542	0.0935597
	DLS	EN_NPi2100	tm23ts23	0.5	LAM	2040	3.692017972577446	3.1787986496032676	0.5132193229741784	0.161451
	DLS	EN_NPi2100	tm23ts23	0.5	LAM	2050	5.062780755630264	4.098861410753796	0.9639193448764685	0.235168
	DLS	EN_NPi2100	tm23ts23	0.5	LAM	2060	5.769222278743398	4.389361582779284	1.3798606959641146	0.314365
	DLS	EN_NPi2100	tm23ts23	0.5	LAM	2070	6.114446860449846	4.363241370831808	1.7512054896180373	0.401354
	DLS	EN_NPi2100	tm23ts23	0.5	LAM	2080	6.201244724321954	4.154082611051781	2.047162113270174	0.492807
	DLS	EN_NPi2100	tm23ts23	0.5	LAM	2090	6.1343378710723435	3.854726286500544	2.2796115845717995	0.591381
	DLS	EN_NPi2100	tm23ts23	0.5	LAM	2100	6.020538945813319	3.5471467132208208	2.4733922325924986	0.697291
	DLS	EN_NPi2100	tm23ts23	0.5	MEA	2030	1.5038478623407054	1.3916298323391145	0.11221803000159092	0.0806378
	DLS	EN_NPi2100	tm23ts23	0.5	MEA	2040	2.665874613496398	2.380112520022869	0.285762	0.120062
	DLS	EN_NPi2100	tm23ts23	0.5	MEA	2050	4.075687037259346	3.483731424850032	0.5919556124093139	0.16992
	DLS	EN_NPi2100	tm23ts23	0.5	MEA	2060	4.706096954875209	3.8401738557343874	0.8659230991408213	0.225491
	DLS	EN_NPi2100	tm23ts23	0.5	MEA	2070	5.221084342598923	4.063078987867333	1.15801	0.285007
	DLS	EN_NPi2100	tm23ts23	0.5	MEA	2080	5.588078534635331	4.139943872742707	1.4481346618926239	0.349796
	DLS	EN_NPi2100	tm23ts23	0.5	MEA	2090	5.802636324654541	4.077335887893726	1.725300436760815	0.423144
	DLS	EN_NPi2100	tm23ts23	0.5	MEA	2100	5.8987097012208025	3.918605068133373	1.9801046330874295	0.505309
	DLS	EN_NPi2100	tm23ts23	0.5	NAM	2030	0.8593734539852996	0.7714486888255545	0.0879248	0.113974
	DLS	EN_NPi2100	tm23ts23	0.5	NAM	2040	0.9200776069408456	0.7687336066429726	0.15134400029787298	0.196874
	DLS	EN_NPi2100	tm23ts23	0.5	NAM	2050	0.9780618359898319	0.7614708246293989	0.21659101136043302	0.284438
	DLS	EN_NPi2100	tm23ts23	0.5	NAM	2060	1.012916530789619	0.7341671789703306	0.2787493518192885	0.379681
	DLS	EN_NPi2100	tm23ts23	0.5	NAM	2070	1.046313807997811	0.7087142792186075	0.3375995287792034	0.476355
	DLS	EN_NPi2100	tm23ts23	0.5	NAM	2080	1.0725089970728738	0.680155	0.39235361583664086	0.576859
	DLS	EN_NPi2100	tm23ts23	0.5	NAM	2090	1.091890223065457	0.6486324656539031	0.44325775741155393	0.683373
	DLS	EN_NPi2100	tm23ts23	0.5	NAM	2100	1.1054317188973448	0.6159175996515921	0.4895141192457527	0.794772
	DLS	EN_NPi2100	tm23ts23	0.5	PAO	2030	0.21835326873216768	0.19331055840910283	0.0250427	0.129547
	DLS	EN_NPi2100	tm23ts23	0.5	PAO	2040	0.22622479690909997	0.1879672922482963	0.0382575	0.203533
	DLS	EN_NPi2100	tm23ts23	0.5	PAO	2050	0.22890115418479984	0.1784140263119191	0.0504871	0.282977
	DLS	EN_NPi2100	tm23ts23	0.5	PAO	2060	0.2249119991329484	0.16418632618161372	0.060725672951334686	0.369858
	DLS	EN_NPi2100	tm23ts23	0.5	PAO	2070	0.2182696364738543	0.14928669755023916	0.0689829	0.462084
	DLS	EN_NPi2100	tm23ts23	0.5	PAO	2080	0.21034835783419115	0.13483845404089723	0.0755099	0.560003
	DLS	EN_NPi2100	tm23ts23	0.5	PAO	2090	0.20160237355963478	0.1210678492550014	0.0805345	0.665202
	DLS	EN_NPi2100	tm23ts23	0.5	PAO	2100	0.19230497644811398	0.10819170637574081	0.0841133	0.777447
	DLS	EN_NPi2100	tm23ts23	0.5	PAS	2030	1.0915318064886228	1.0214603053734415	0.0700715	0.0685993
	DLS	EN_NPi2100	tm23ts23	0.5	PAS	2040	1.9096957708589608	1.7275508771673267	0.1821448936916341	0.105435
	DLS	EN_NPi2100	tm23ts23	0.5	PAS	2050	2.823715790200872	2.463091726183058	0.3606240640178138	0.146411
	DLS	EN_NPi2100	tm23ts23	0.5	PAS	2060	3.274544916370073	2.7447800844036583	0.5297648319664146	0.193008
	DLS	EN_NPi2100	tm23ts23	0.5	PAS	2070	3.4686435122837516	2.7942907859287445	0.6743527263550071	0.241332
	DLS	EN_NPi2100	tm23ts23	0.5	PAS	2080	3.6644369594411397	2.8339375062779277	0.8304994531632119	0.293055
	DLS	EN_NPi2100	tm23ts23	0.5	PAS	2090	3.7515084315850302	2.777376366777321	0.9741320648077094	0.350738
	DLS	EN_NPi2100	tm23ts23	0.5	PAS	2100	3.6922435444849455	2.6138960446825497	1.0783474998023959	0.412544
	DLS	EN_NPi2100	tm23ts23	0.5	SAS	2030	2.1703692700539934	2.0720620520089392	0.0983072	0.0474441
	DLS	EN_NPi2100	tm23ts23	0.5	SAS	2040	4.092325396869868	3.7631203400021813	0.329205	0.0874819
	DLS	EN_NPi2100	tm23ts23	0.5	SAS	2050	7.25731	6.427974863245344	0.8293340032225052	0.129019
	DLS	EN_NPi2100	tm23ts23	0.5	SAS	2060	10.162821559715017	8.658283306596829	1.504538253118188	0.173769
	DLS	EN_NPi2100	tm23ts23	0.5	SAS	2070	12.802891880483255	10.484761868934271	2.318130011548984	0.221095
	DLS	EN_NPi2100	tm23ts23	0.5	SAS	2080	14.46411568955067	11.380061176163805	3.0840545133868655	0.271005
	DLS	EN_NPi2100	tm23ts23	0.5	SAS	2090	14.948339457295319	11.282645707500318	3.6656937497950004	0.324897
	DLS	EN_NPi2100	tm23ts23	0.5	SAS	2100	14.6807	10.619003785106425	4.061672254601175	0.382491
	DLS	EN_NPi2100	tm23ts23	0.5	WEU	2030	1.5575152357446271	1.3784910779667576	0.1790241577778695	0.12987
	DLS	EN_NPi2100	tm23ts23	0.5	WEU	2040	1.7850145527601204	1.4617283150179579	0.3232862377421626	0.221167
	DLS	EN_NPi2100	tm23ts23	0.5	WEU	2050	1.9419898119862806	1.4706588267934826	0.47133098519279804	0.32049
	DLS	EN_NPi2100	tm23ts23	0.5	WEU	2060	1.976420217896369	1.379226584591246	0.5971936333051231	0.432992
	DLS	EN_NPi2100	tm23ts23	0.5	WEU	2070	1.9839166505710695	1.2754628868254123	0.7084537637456572	0.555448
	DLS	EN_NPi2100	tm23ts23	0.5	WEU	2080	1.9799724380515231	1.1729752683753643	0.8069971696761589	0.687992
	DLS	EN_NPi2100	tm23ts23	0.5	WEU	2090	1.9709939974283774	1.0763495915186898	0.8946444059096876	0.831184
	DLS	EN_NPi2100	tm23ts23	0.5	WEU	2100	1.9518024020015154	0.9834847264318756	0.9683176755696399	0.984578

## Sheet: Regional Mapping
iso3c	m49code	r5_iamc	r6_ar6	r10_unif	r10_iamc	r10_ar6	r10_message	r12_message	r12_remind	r12_witch	r22_ar6	m49hi_ar6	m49med_ar6	m49lo_ar6	m49dev_ar6	m49sids_ar6	m49lldc_ar6	m49ldc_ar6	annexi_ar6	wmo_ar6	eu_ar6	oecd_ar6	wb_ar6
AGO	24	R5MAF	Africa	R10AFRMEA	R10AFRICA	Africa	Sub-saharan Africa	Sub-Saharan Africa	Sub-saharan Africa	ssa	Southern and middle Africa	Africa	Sub-Saharan Africa	Middle Africa	Developing			LDC	Non-Annex I	I			Lower-middle
BDI	108	R5MAF	Africa	R10AFRMEA	R10AFRICA	Africa	Sub-saharan Africa	Sub-Saharan Africa	Sub-saharan Africa	ssa	Eastern Africa	Africa	Sub-Saharan Africa	Eastern Africa	Developing		LLDC	LDC	Non-Annex I	I			Low
BEN	204	R5MAF	Africa	R10AFRMEA	R10AFRICA	Africa	Sub-saharan Africa	Sub-Saharan Africa	Sub-saharan Africa	ssa	Western Africa	Africa	Sub-Saharan Africa	Western Africa	Developing			LDC	Non-Annex I	I			Lower-middle
BFA	854	R5MAF	Africa	R10AFRMEA	R10AFRICA	Africa	Sub-saharan Africa	Sub-Saharan Africa	Sub-saharan Africa	ssa	Western Africa	Africa	Sub-Saharan Africa	Western Africa	Developing		LLDC	LDC	Non-Annex I	I			Low
BWA	72	R5MAF	Africa	R10AFRMEA	R10AFRICA	Africa	Sub-saharan Africa	Sub-Saharan Africa	Sub-saharan Africa	ssa	Southern and middle Africa	Africa	Sub-Saharan Africa	Southern Africa	Developing		LLDC		Non-Annex I	I			Upper middle
CAF	140	R5MAF	Africa	R10AFRMEA	R10AFRICA	Africa	Sub-saharan Africa	Sub-Saharan Africa	Sub-saharan Africa	ssa	Southern and middle Africa	Africa	Sub-Saharan Africa	Middle Africa	Developing		LLDC	LDC	Non-Annex I	I			Low
CIV	384	R5MAF	Africa	R10AFRMEA	R10AFRICA	Africa	Sub-saharan Africa	Sub-Saharan Africa	Sub-saharan Africa	ssa	Western Africa	Africa	Sub-Saharan Africa	Western Africa	Developing				Non-Annex I	I			Lower-middle
CMR	120	R5MAF	Africa	R10AFRMEA	R10AFRICA	Africa	Sub-saharan Africa	Sub-Saharan Africa	Sub-saharan Africa	ssa	Southern and middle Africa	Africa	Sub-Saharan Africa	Middle Africa	Developing				Non-Annex I	I			Lower-middle
COD	180	R5MAF	Africa	R10AFRMEA	R10AFRICA	Africa	Sub-saharan Africa	Sub-Saharan Africa	Sub-saharan Africa	ssa	Southern and middle Africa	Africa	Sub-Saharan Africa	Middle Africa	Developing			LDC	Non-Annex I	I			Low
COG	178	R5MAF	Africa	R10AFRMEA	R10AFRICA	Africa	Sub-saharan Africa	Sub-Saharan Africa	Sub-saharan Africa	ssa	Southern and middle Africa	Africa	Sub-Saharan Africa	Middle Africa	Developing				Non-Annex I	I			Lower-middle
COM	174	R5MAF	Africa	R10AFRMEA	R10AFRICA	Africa	Sub-saharan Africa	Sub-Saharan Africa	Sub-saharan Africa	ssa	Eastern Africa	Africa	Sub-Saharan Africa	Eastern Africa	Developing	SIDS		LDC	Non-Annex I	I			Lower-middle
CPV	132	R5MAF	Africa	R10AFRMEA	R10AFRICA	Africa	Sub-saharan Africa	Sub-Saharan Africa	Sub-saharan Africa	ssa	Western Africa	Africa	Sub-Saharan Africa	Western Africa	Developing	SIDS			Non-Annex I	I			Lower-middle
DJI	262	R5MAF	Africa	R10AFRMEA	R10AFRICA	Africa	Sub-saharan Africa	Sub-Saharan Africa	Sub-saharan Africa	mena	Eastern Africa	Africa	Sub-Saharan Africa	Eastern Africa	Developing			LDC	Non-Annex I	I			Lower-middle
DZA	12	R5MAF	Africa	R10AFRMEA	R10AFRICA	Africa	Middle East and North Africa	Middle East and North Africa	Middle East, North Africa, Central Asia	mena	North Africa	Africa	Northern Africa	Northern Africa	Developing				Non-Annex I	I			Lower-middle
EGY	818	R5MAF	Africa	R10AFRMEA	R10AFRICA	Africa	Middle East and North Africa	Middle East and North Africa	Middle East, North Africa, Central Asia	mena	North Africa	Africa	Northern Africa	Northern Africa	Developing				Non-Annex I	I			Lower-middle
ERI	232	R5MAF	Africa	R10AFRMEA	R10AFRICA	Africa	Sub-saharan Africa	Sub-Saharan Africa	Sub-saharan Africa	ssa	Eastern Africa	Africa	Sub-Saharan Africa	Eastern Africa	Developing			LDC	Non-Annex I	I			Low
ESH	732	R5MAF	Africa	R10AFRMEA	R10AFRICA	Africa	Sub-saharan Africa	Middle East and North Africa	Middle East, North Africa, Central Asia	mena	North Africa	Africa	Northern Africa	Northern Africa	Developing				Territory
ETH	231	R5MAF	Africa	R10AFRMEA	R10AFRICA	Africa	Sub-saharan Africa	Sub-Saharan Africa	Sub-saharan Africa	ssa	Eastern Africa	Africa	Sub-Saharan Africa	Eastern Africa	Developing		LLDC	LDC	Non-Annex I	I			Low
GAB	266	R5MAF	Africa	R10AFRMEA	R10AFRICA	Africa	Sub-saharan Africa	Sub-Saharan Africa	Sub-saharan Africa	ssa	Southern and middle Africa	Africa	Sub-Saharan Africa	Middle Africa	Developing				Non-Annex I	I			Upper middle
GHA	288	R5MAF	Africa	R10AFRMEA	R10AFRICA	Africa	Sub-saharan Africa	Sub-Saharan Africa	Sub-saharan Africa	ssa	Western Africa	Africa	Sub-Saharan Africa	Western Africa	Developing				Non-Annex I	I			Lower-middle
GIN	324	R5MAF	Africa	R10AFRMEA	R10AFRICA	Africa	Sub-saharan Africa	Sub-Saharan Africa	Sub-saharan Africa	ssa	Western Africa	Africa	Sub-Saharan Africa	Western Africa	Developing			LDC	Non-Annex I	I			Low
GMB	270	R5MAF	Africa	R10AFRMEA	R10AFRICA	Africa	Sub-saharan Africa	Sub-Saharan Africa	Sub-saharan Africa	ssa	Western Africa	Africa	Sub-Saharan Africa	Western Africa	Developing			LDC	Non-Annex I	I			Low
GNB	624	R5MAF	Africa	R10AFRMEA	R10AFRICA	Africa	Sub-saharan Africa	Sub-Saharan Africa	Sub-saharan Africa	ssa	Western Africa	Africa	Sub-Saharan Africa	Western Africa	Developing	SIDS		LDC	Non-Annex I	I			Low
GNQ	226	R5MAF	Africa	R10AFRMEA	R10AFRICA	Africa	Sub-saharan Africa	Sub-Saharan Africa	Sub-saharan Africa	ssa	Southern and middle Africa	Africa	Sub-Saharan Africa	Middle Africa	Developing				Non-Annex I	I			Upper middle
KEN	404	R5MAF	Africa	R10AFRMEA	R10AFRICA	Africa	Sub-saharan Africa	Sub-Saharan Africa	Sub-saharan Africa	ssa	Eastern Africa	Africa	Sub-Saharan Africa	Eastern Africa	Developing				Non-Annex I	I			Lower-middle
LBR	430	R5MAF	Africa	R10AFRMEA	R10AFRICA	Africa	Sub-saharan Africa	Sub-Saharan Africa	Sub-saharan Africa	ssa	Western Africa	Africa	Sub-Saharan Africa	Western Africa	Developing			LDC	Non-Annex I	I			Low
LBY	434	R5MAF	Africa	R10AFRMEA	R10AFRICA	Africa	Middle East and North Africa	Middle East and North Africa	Middle East, North Africa, Central Asia	mena	North Africa	Africa	Northern Africa	Northern Africa	Developing				Non-Annex I	I			Upper middle
LSO	426	R5MAF	Africa	R10AFRMEA	R10AFRICA	Africa	Sub-saharan Africa	Sub-Saharan Africa	Sub-saharan Africa	ssa	Southern and middle Africa	Africa	Sub-Saharan Africa	Southern Africa	Developing		LLDC	LDC	Non-Annex I	I			Lower-middle
MAR	504	R5MAF	Africa	R10AFRMEA	R10AFRICA	Africa	Middle East and North Africa	Middle East and North Africa	Middle East, North Africa, Central Asia	mena	North Africa	Africa	Northern Africa	Northern Africa	Developing				Non-Annex I	I			Lower-middle
MDG	450	R5MAF	Africa	R10AFRMEA	R10AFRICA	Africa	Sub-saharan Africa	Sub-Saharan Africa	Sub-saharan Africa	ssa	Eastern Africa	Africa	Sub-Saharan Africa	Eastern Africa	Developing			LDC	Non-Annex I	I			Low
MLI	466	R5MAF	Africa	R10AFRMEA	R10AFRICA	Africa	Sub-saharan Africa	Sub-Saharan Africa	Sub-saharan Africa	ssa	Western Africa	Africa	Sub-Saharan Africa	Western Africa	Developing		LLDC	LDC	Non-Annex I	I			Low
MOZ	508	R5MAF	Africa	R10AFRMEA	R10AFRICA	Africa	Sub-saharan Africa	Sub-Saharan Africa	Sub-saharan Africa	ssa	Eastern Africa	Africa	Sub-Saharan Africa	Eastern Africa	Developing			LDC	Non-Annex I	I			Low
MRT	478	R5MAF	Africa	R10AFRMEA	R10AFRICA	Africa	Sub-saharan Africa	Sub-Saharan Africa	Sub-saharan Africa	ssa	Western Africa	Africa	Sub-Saharan Africa	Western Africa	Developing			LDC	Non-Annex I	I			Lower-middle
MUS	480	R5MAF	Africa	R10AFRMEA	R10AFRICA	Africa	Sub-saharan Africa	Sub-Saharan Africa	Sub-saharan Africa	ssa	Eastern Africa	Africa	Sub-Saharan Africa	Eastern Africa	Developing	SIDS			Non-Annex I	I			Upper middle
MWI	454	R5MAF	Africa	R10AFRMEA	R10AFRICA	Africa	Sub-saharan Africa	Sub-Saharan Africa	Sub-saharan Africa	ssa	Eastern Africa	Africa	Sub-Saharan Africa	Eastern Africa	Developing		LLDC	LDC	Non-Annex I	I			Low
MYT	175	R5MAF	Africa	R10AFRMEA	R10AFRICA	Africa	Europe	Sub-Saharan Africa	Sub-saharan Africa	ssa	Eastern Africa	Africa	Sub-Saharan Africa	Eastern Africa	Developing				Territory
NAM	516	R5MAF	Africa	R10AFRMEA	R10AFRICA	Africa	Sub-saharan Africa	Sub-Saharan Africa	Sub-saharan Africa	ssa	Southern and middle Africa	Africa	Sub-Saharan Africa	Southern Africa	Developing				Non-Annex I	I			Upper middle
NER	562	R5MAF	Africa	R10AFRMEA	R10AFRICA	Africa	Sub-saharan Africa	Sub-Saharan Africa	Sub-saharan Africa	ssa	Western Africa	Africa	Sub-Saharan Africa	Western Africa	Developing		LLDC	LDC	Non-Annex I	I			Low
NGA	566	R5MAF	Africa	R10AFRMEA	R10AFRICA	Africa	Sub-saharan Africa	Sub-Saharan Africa	Sub-saharan Africa	ssa	Western Africa	Africa	Sub-Saharan Africa	Western Africa	Developing				Non-Annex I	I			Lower-middle
REU	638	R5MAF	Africa	R10AFRMEA	R10AFRICA	Africa	Europe	Sub-Saharan Africa	Sub-saharan Africa	ssa	Eastern Africa	Africa	Sub-Saharan Africa	Eastern Africa	Developing				Territory
RWA	646	R5MAF	Africa	R10AFRMEA	R10AFRICA	Africa	Sub-saharan Africa	Sub-Saharan Africa	Sub-saharan Africa	ssa	Eastern Africa	Africa	Sub-Saharan Africa	Eastern Africa	Developing		LLDC	LDC	Non-Annex I	I			Low
SDN	729	R5MAF	Africa	R10AFRMEA	R10AFRICA	Africa	Middle East and North Africa	Middle East and North Africa	Middle East, North Africa, Central Asia	ssa	North Africa	Africa	Northern Africa	Northern Africa	Developing			LDC	Non-Annex I	I			Low
SEN	686	R5MAF	Africa	R10AFRMEA	R10AFRICA	Africa	Sub-saharan Africa	Sub-Saharan Africa	Sub-saharan Africa	ssa	Western Africa	Africa	Sub-Saharan Africa	Western Africa	Developing			LDC	Non-Annex I	I			Lower-middle
SLE	694	R5MAF	Africa	R10AFRMEA	R10AFRICA	Africa	Sub-saharan Africa	Sub-Saharan Africa	Sub-saharan Africa	ssa	Western Africa	Africa	Sub-Saharan Africa	Western Africa	Developing			LDC	Non-Annex I	I			Low
SOM	706	R5MAF	Africa	R10AFRMEA	R10AFRICA	Africa	Sub-saharan Africa	Sub-Saharan Africa	Sub-saharan Africa	ssa	Eastern Africa	Africa	Sub-Saharan Africa	Eastern Africa	Developing			LDC	Non-Annex I	I			Low
SSD	728	R5MAF	Africa	R10AFRMEA	R10AFRICA	Africa	Middle East and North Africa	Middle East and North Africa	Sub-saharan Africa	ssa	Eastern Africa	Africa	Sub-Saharan Africa	Eastern Africa	Developing		LLDC	LDC	Non-Annex I	I			Low
STP	678	R5MAF	Africa	R10AFRMEA	R10AFRICA	Africa	Sub-saharan Africa	Sub-Saharan Africa	Sub-saharan Africa	ssa	Southern and middle Africa	Africa	Sub-Saharan Africa	Middle Africa	Developing	SIDS		LDC	Non-Annex I	I			Lower-middle
SWZ	748	R5MAF	Africa	R10AFRMEA	R10AFRICA	Africa	Sub-saharan Africa	Sub-Saharan Africa	Sub-saharan Africa	ssa	Southern and middle Africa	Africa	Sub-Saharan Africa	Southern Africa	Developing		LLDC		Non-Annex I	I			Lower-middle
TCD	148	R5MAF	Africa	R10AFRMEA	R10AFRICA	Africa	Sub-saharan Africa	Sub-Saharan Africa	Sub-saharan Africa	ssa	Southern and middle Africa	Africa	Sub-Saharan Africa	Middle Africa	Developing		LLDC	LDC	Non-Annex I	I			Low
TGO	768	R5MAF	Africa	R10AFRMEA	R10AFRICA	Africa	Sub-saharan Africa	Sub-Saharan Africa	Sub-saharan Africa	ssa	Western Africa	Africa	Sub-Saharan Africa	Western Africa	Developing			LDC	Non-Annex I	I			Low
TUN	788	R5MAF	Africa	R10AFRMEA	R10AFRICA	Africa	Middle East and North Africa	Middle East and North Africa	Middle East, North Africa, Central Asia	mena	North Africa	Africa	Northern Africa	Northern Africa	Developing				Non-Annex I	I			Lower-middle
TZA	834	R5MAF	Africa	R10AFRMEA	R10AFRICA	Africa	Sub-saharan Africa	Sub-Saharan Africa	Sub-saharan Africa	ssa	Eastern Africa	Africa	Sub-Saharan Africa	Eastern Africa	Developing			LDC	Non-Annex I	I			Lower-middle
UGA	800	R5MAF	Africa	R10AFRMEA	R10AFRICA	Africa	Sub-saharan Africa	Sub-Saharan Africa	Sub-saharan Africa	ssa	Eastern Africa	Africa	Sub-Saharan Africa	Eastern Africa	Developing		LLDC	LDC	Non-Annex I	I			Low
ZAF	710	R5MAF	Africa	R10AFRMEA	R10AFRICA	Africa	Sub-saharan Africa	Sub-Saharan Africa	Sub-saharan Africa	kosau	Southern and middle Africa	Africa	Sub-Saharan Africa	Southern Africa	Developing				Non-Annex I	I			Upper middle
ZMB	894	R5MAF	Africa	R10AFRMEA	R10AFRICA	Africa	Sub-saharan Africa	Sub-Saharan Africa	Sub-saharan Africa	ssa	Eastern Africa	Africa	Sub-Saharan Africa	Eastern Africa	Developing		LLDC	LDC	Non-Annex I	I			Lower-middle
ZWE	716	R5MAF	Africa	R10AFRMEA	R10AFRICA	Africa	Sub-saharan Africa	Sub-Saharan Africa	Sub-saharan Africa	ssa	Eastern Africa	Africa	Sub-Saharan Africa	Eastern Africa	Developing		LLDC		Non-Annex I	I			Lower-middle
CHN	156	R5ASIA	Asia and developing Pacific	R10EASPAS	R10CHINA+	Eastern Asia	Centrally Planned Asia and China	China	China	china	Eastern Asia	Asia	Eastern Asia	Eastern Asia	Developing				Non-Annex I	II			Upper middle
HKG	344	R5ASIA	Asia and developing Pacific	R10EASPAS	R10CHINA+	Eastern Asia	Centrally Planned Asia and China	China	China	china	Eastern Asia	Asia	Eastern Asia	Eastern Asia	Developing				Territory				High
KHM	116	R5ASIA	Asia and developing Pacific	R10EASPAS	R10CHINA+	South-East Asia and developing Pacific	Centrally Planned Asia and China	Rest Centrally Planned Asia	Other Asia	easia	South-East Asia	Asia	South-Eastern Asia	South-Eastern Asia	Developing			LDC	Non-Annex I	II			Lower-middle
LAO	418	R5ASIA	Asia and developing Pacific	R10EASPAS	R10CHINA+	South-East Asia and developing Pacific	Centrally Planned Asia and China	Rest Centrally Planned Asia	Other Asia	easia	South-East Asia	Asia	South-Eastern Asia	South-Eastern Asia	Developing		LLDC	LDC	Non-Annex I	II			Lower-middle
MAC	446	R5ASIA	Asia and developing Pacific	R10EASPAS	R10CHINA+	Eastern Asia	Centrally Planned Asia and China	Other Pacific Asia	China	china	Eastern Asia	Asia	Eastern Asia	Eastern Asia	Developing				Territory				High
MMR	104	R5ASIA	Asia and developing Pacific	R10EASPAS	R10CHINA+	South-East Asia and developing Pacific	Other Pacific Asia	Other Pacific Asia	Other Asia	easia	South-East Asia	Asia	South-Eastern Asia	South-Eastern Asia	Developing			LDC	Non-Annex I	II			Lower-middle
MNG	496	R5ASIA	Asia and developing Pacific	R10EASPAS	R10CHINA+	Eastern Asia	Centrally Planned Asia and China	Rest Centrally Planned Asia	Other Asia	easia	Eastern Asia	Asia	Eastern Asia	Eastern Asia	Developing		LLDC		Non-Annex I	II			Lower-middle
PRK	408	R5ASIA	Asia and developing Pacific	R10EASPAS	R10CHINA+	Eastern Asia	Centrally Planned Asia and China	Rest Centrally Planned Asia	Other Asia	easia	Eastern Asia	Asia	Eastern Asia	Eastern Asia	Developing				Non-Annex I	II			Low
VNM	704	R5ASIA	Asia and developing Pacific	R10EASPAS	R10CHINA+	South-East Asia and developing Pacific	Centrally Planned Asia and China	Rest Centrally Planned Asia	Other Asia	easia	South-East Asia	Asia	South-Eastern Asia	South-Eastern Asia	Developing				Non-Annex I	II			Lower-middle
AUT	40	R5OECD90+EU	Developed Countries	R10EUR	R10EUROPE	Europe	Europe	Western Europe	EU 28	europe	Northern and western Europe	Europe	Western Europe	Western Europe	Developed				Annex I	VI	EU	OECD	High
BEL	56	R5OECD90+EU	Developed Countries	R10EUR	R10EUROPE	Europe	Europe	Western Europe	EU 28	europe	Northern and western Europe	Europe	Western Europe	Western Europe	Developed				Annex I	VI	EU	OECD	High
BGR	100	R5OECD90+EU	Developed Countries	R10EUR	R10EUROPE	Europe	Europe	Central and Eastern Europe	EU 28	europe	Southern and eastern Europe	Europe	Eastern Europe	Eastern Europe	Developed				Annex I	VI	EU		Upper middle
BIH	70	R5OECD90+EU	Developed Countries	R10EUR	R10EUROPE	Europe	Europe	Central and Eastern Europe	Non-EU28 Europe	te	Southern and eastern Europe	Europe	Southern Europe	Southern Europe	Developed				Non-Annex I	VI			Upper middle
CHE	756	R5OECD90+EU	Developed Countries	R10EUR	R10EUROPE	Europe	Europe	Western Europe	Non-EU28 Europe	europe	Northern and western Europe	Europe	Western Europe	Western Europe	Developed				Annex I	VI		OECD	High
CYP	196	R5OECD90+EU	Developed Countries	R10EUR	R10EUROPE	Europe	Europe	Western Europe	EU 28	europe	Southern and eastern Europe	Asia	Western Asia	Western Asia	Developed				Annex I	VI	EU		High
DEU	276	R5OECD90+EU	Developed Countries	R10EUR	R10EUROPE	Europe	Europe	Western Europe	EU 28	europe	Northern and western Europe	Europe	Western Europe	Western Europe	Developed				Annex I	VI	EU	OECD	High
DNK	208	R5OECD90+EU	Developed Countries	R10EUR	R10EUROPE	Europe	Europe	Western Europe	EU 28	europe	Northern and western Europe	Europe	Northern Europe	Northern Europe	Developed				Annex I	VI	EU	OECD	High
ESP	724	R5OECD90+EU	Developed Countries	R10EUR	R10EUROPE	Europe	Europe	Western Europe	EU 28	europe	Southern and eastern Europe	Europe	Southern Europe	Southern Europe	Developed				Annex I	VI	EU	OECD	High
EST	233	R5OECD90+EU	Developed Countries	R10EUR	R10EUROPE	Europe	Europe	Central and Eastern Europe	EU 28	europe	Northern and western Europe	Europe	Northern Europe	Northern Europe	Developed				Annex I	VI	EU	OECD	High
FIN	246	R5OECD90+EU	Developed Countries	R10EUR	R10EUROPE	Europe	Europe	Western Europe	EU 28	europe	Northern and western Europe	Europe	Northern Europe	Northern Europe	Developed				Annex I	VI	EU	OECD	High
FRA	250	R5OECD90+EU	Developed Countries	R10EUR	R10EUROPE	Europe	Europe	Western Europe	EU 28	europe	Northern and western Europe	Europe	Western Europe	Western Europe	Developed				Annex I	VI	EU	OECD	High
GBR	826	R5OECD90+EU	Developed Countries	R10EUR	R10EUROPE	Europe	Europe	Western Europe	EU 28	europe	Northern and western Europe	Europe	Northern Europe	Northern Europe	Developed				Annex I	VI		OECD	High
GRC	300	R5OECD90+EU	Developed Countries	R10EUR	R10EUROPE	Europe	Europe	Western Europe	EU 28	europe	Southern and eastern Europe	Europe	Southern Europe	Southern Europe	Developed				Annex I	VI	EU	OECD	High
HRV	191	R5OECD90+EU	Developed Countries	R10EUR	R10EUROPE	Europe	Europe	Central and Eastern Europe	EU 28	europe	Southern and eastern Europe	Europe	Southern Europe	Southern Europe	Developed				Annex I	VI	EU		High
HUN	348	R5OECD90+EU	Developed Countries	R10EUR	R10EUROPE	Europe	Europe	Central and Eastern Europe	EU 28	europe	Southern and eastern Europe	Europe	Eastern Europe	Eastern Europe	Developed				Annex I	VI	EU	OECD	High
IRL	372	R5OECD90+EU	Developed Countries	R10EUR	R10EUROPE	Europe	Europe	Western Europe	EU 28	europe	Northern and western Europe	Europe	Northern Europe	Northern Europe	Developed				Annex I	VI	EU	OECD	High
ISL	352	R5OECD90+EU	Developed Countries	R10EUR	R10EUROPE	Europe	Europe	Western Europe	Non-EU28 Europe	europe	Northern and western Europe	Europe	Northern Europe	Northern Europe	Developed				Annex I	VI		OECD	High
ITA	380	R5OECD90+EU	Developed Countries	R10EUR	R10EUROPE	Europe	Europe	Western Europe	EU 28	europe	Southern and eastern Europe	Europe	Southern Europe	Southern Europe	Developed				Annex I	VI	EU	OECD	High
LTU	440	R5OECD90+EU	Developed Countries	R10EUR	R10EUROPE	Europe	Europe	Central and Eastern Europe	EU 28	europe	Northern and western Europe	Europe	Northern Europe	Northern Europe	Developed				Annex I	VI	EU	OECD	High
LUX	442	R5OECD90+EU	Developed Countries	R10EUR	R10EUROPE	Europe	Europe	Western Europe	EU 28	europe	Northern and western Europe	Europe	Western Europe	Western Europe	Developed				Annex I	VI	EU	OECD	High
LVA	428	R5OECD90+EU	Developed Countries	R10EUR	R10EUROPE	Europe	Europe	Central and Eastern Europe	EU 28	europe	Northern and western Europe	Europe	Northern Europe	Northern Europe	Developed				Annex I	VI	EU	OECD	High
MKD	807	R5OECD90+EU	Europe	R10EUR	R10EUROPE	Europe	Europe	Central and Eastern Europe	Non-EU28 Europe	te	Southern and eastern Europe	Europe	Southern Europe	Southern Europe	Developed		LLDC		Non-Annex I	VI			Upper middle
MLT	470	R5OECD90+EU	Developed Countries	R10EUR	R10EUROPE	Europe	Europe	Western Europe	EU 28	europe	Southern and eastern Europe	Europe	Southern Europe	Southern Europe	Developed				Annex I	VI	EU		High
MNE	499	R5OECD90+EU	Developed Countries	R10EUR	R10EUROPE	Europe	Europe	Central and Eastern Europe	Non-EU28 Europe	te	Southern and eastern Europe	Europe	Southern Europe	Southern Europe	Developed				Non-Annex I	VI			Upper middle
NLD	528	R5OECD90+EU	Developed Countries	R10EUR	R10EUROPE	Europe	Europe	Western Europe	EU 28	europe	Northern and western Europe	Europe	Western Europe	Western Europe	Developed				Annex I	VI	EU	OECD	High
NOR	578	R5OECD90+EU	Developed Countries	R10EUR	R10EUROPE	Europe	Europe	Western Europe	Non-EU28 Europe	europe	Northern and western Europe	Europe	Northern Europe	Northern Europe	Developed				Annex I	VI		OECD	High
POL	616	R5OECD90+EU	Developed Countries	R10EUR	R10EUROPE	Europe	Europe	Central and Eastern Europe	EU 28	europe	Southern and eastern Europe	Europe	Eastern Europe	Eastern Europe	Developed				Annex I	VI	EU	OECD	High
PRT	620	R5OECD90+EU	Developed Countries	R10EUR	R10EUROPE	Europe	Europe	Western Europe	EU 28	europe	Southern and eastern Europe	Europe	Southern Europe	Southern Europe	Developed				Annex I	VI	EU	OECD	High
ROU	642	R5OECD90+EU	Developed Countries	R10EUR	R10EUROPE	Europe	Europe	Central and Eastern Europe	EU 28	europe	Southern and eastern Europe	Europe	Eastern Europe	Eastern Europe	Developed				Annex I	VI	EU		Upper middle
SRB	688	R5OECD90+EU	Developed Countries	R10EUR	R10EUROPE	Europe	Europe	Central and Eastern Europe	Non-EU28 Europe	te	Southern and eastern Europe	Europe	Southern Europe	Southern Europe	Developed				Non-Annex I	VI			Upper middle
SVK	703	R5OECD90+EU	Developed Countries	R10EUR	R10EUROPE	Europe	Europe	Central and Eastern Europe	EU 28	europe	Southern and eastern Europe	Europe	Eastern Europe	Eastern Europe	Developed				Annex I	VI	EU	OECD	High
SVN	705	R5OECD90+EU	Developed Countries	R10EUR	R10EUROPE	Europe	Europe	Central and Eastern Europe	EU 28	europe	Southern and eastern Europe	Europe	Southern Europe	Southern Europe	Developed				Annex I	VI	EU	OECD	High
SWE	752	R5OECD90+EU	Developed Countries	R10EUR	R10EUROPE	Europe	Europe	Western Europe	EU 28	europe	Northern and western Europe	Europe	Northern Europe	Northern Europe	Developed				Annex I	VI	EU	OECD	High
TUR	792	R5OECD90+EU	Developed Countries	R10EUR	R10EUROPE	Europe	Europe	Western Europe	Non-EU28 Europe	te	Southern and eastern Europe	Asia	Western Asia	Western Asia	Developed				Annex I	VI		OECD	Upper middle
AFG	4	R5ASIA	Asia and developing Pacific	R10SAS	R10INDIA+	Southern Asia	South Asia	South Asia	Other Asia	sasia	Rest of Southern Asia	Asia	Southern Asia	Southern Asia	Developing		LLDC	LDC	Non-Annex I	II			Low
BGD	50	R5ASIA	Asia and developing Pacific	R10SAS	R10INDIA+	Southern Asia	South Asia	South Asia	Other Asia	sasia	Rest of Southern Asia	Asia	Southern Asia	Southern Asia	Developing			LDC	Non-Annex I	II			Lower-middle
BTN	64	R5ASIA	Asia and developing Pacific	R10SAS	R10INDIA+	Southern Asia	South Asia	South Asia	Other Asia	sasia	Rest of Southern Asia	Asia	Southern Asia	Southern Asia	Developing		LLDC	LDC	Non-Annex I	II			Lower-middle
IND	356	R5ASIA	Asia and developing Pacific	R10SAS	R10INDIA+	Southern Asia	South Asia	South Asia	India	india	India & Sri Lanka	Asia	Southern Asia	Southern Asia	Developing				Non-Annex I	II			Lower-middle
LKA	144	R5ASIA	Asia and developing Pacific	R10SAS	R10INDIA+	Southern Asia	South Asia	South Asia	Other Asia	sasia	India & Sri Lanka	Asia	Southern Asia	Southern Asia	Developing				Non-Annex I	II			Lower-middle
MDV	462	R5ASIA	Asia and developing Pacific	R10SAS	R10INDIA+	Southern Asia	South Asia	South Asia	Other Asia	sasia	Rest of Southern Asia	Asia	Southern Asia	Southern Asia	Developing	SIDS			Non-Annex I	II			Upper middle
NPL	524	R5ASIA	Asia and developing Pacific	R10SAS	R10INDIA+	Southern Asia	South Asia	South Asia	Other Asia	sasia	Rest of Southern Asia	Asia	Southern Asia	Southern Asia	Developing		LLDC	LDC	Non-Annex I	II			Lower-middle
PAK	586	R5ASIA	Asia and developing Pacific	R10SAS	R10INDIA+	Southern Asia	South Asia	South Asia	Other Asia	sasia	Rest of Southern Asia	Asia	Southern Asia	Southern Asia	Developing				Non-Annex I	II			Lower-middle
ARG	32	R5LAM	Latin America and Caribbean	R10LAM	R10LATIN_AM	Latin America and Caribbean	Latin America and the Caribbean	Latin America and The Caribbean	Latin America and the Caribbean	laca	South America	Americas	Latin America and the Caribbean	South America	Developing				Non-Annex I	III			Upper middle
BHS	44	R5LAM	Latin America and Caribbean	R10LAM	R10LATIN_AM	Latin America and Caribbean	Latin America and the Caribbean	Latin America and The Caribbean	Latin America and the Caribbean	laca	Caribbean	Americas	Latin America and the Caribbean	Caribbean	Developing	SIDS			Non-Annex I	IV			High
BLZ	84	R5LAM	Latin America and Caribbean	R10LAM	R10LATIN_AM	Latin America and Caribbean	Latin America and the Caribbean	Latin America and The Caribbean	Latin America and the Caribbean	laca	Meso America	Americas	Latin America and the Caribbean	Central America	Developing	SIDS			Non-Annex I	IV			Lower-middle
BOL	68	R5LAM	Latin America and Caribbean	R10LAM	R10LATIN_AM	Latin America and Caribbean	Latin America and the Caribbean	Latin America and The Caribbean	Latin America and the Caribbean	laca	South America	Americas	Latin America and the Caribbean	South America	Developing		LLDC		Non-Annex I	III			Lower-middle
BRA	76	R5LAM	Latin America and Caribbean	R10LAM	R10LATIN_AM	Latin America and Caribbean	Latin America and the Caribbean	Latin America and The Caribbean	Latin America and the Caribbean	laca	South America	Americas	Latin America and the Caribbean	South America	Developing				Non-Annex I	III			Upper middle
BRB	52	R5LAM	Latin America and Caribbean	R10LAM	R10LATIN_AM	Latin America and Caribbean	Latin America and the Caribbean	Latin America and The Caribbean	Latin America and the Caribbean	laca	Caribbean	Americas	Latin America and the Caribbean	Caribbean	Developing	SIDS			Non-Annex I	IV			High
CHL	152	R5LAM	Latin America and Caribbean	R10LAM	R10LATIN_AM	Latin America and Caribbean	Latin America and the Caribbean	Latin America and The Caribbean	Latin America and the Caribbean	laca	South America	Americas	Latin America and the Caribbean	South America	Developing				Non-Annex I	III		OECD	High
COL	170	R5LAM	Latin America and Caribbean	R10LAM	R10LATIN_AM	Latin America and Caribbean	Latin America and the Caribbean	Latin America and The Caribbean	Latin America and the Caribbean	laca	South America	Americas	Latin America and the Caribbean	South America	Developing				Non-Annex I	III		OECD	Upper middle
CRI	188	R5LAM	Latin America and Caribbean	R10LAM	R10LATIN_AM	Latin America and Caribbean	Latin America and the Caribbean	Latin America and The Caribbean	Latin America and the Caribbean	laca	Meso America	Americas	Latin America and the Caribbean	Central America	Developing				Non-Annex I	IV		OECD	Upper middle
CUB	192	R5LAM	Latin America and Caribbean	R10LAM	R10LATIN_AM	Latin America and Caribbean	Latin America and the Caribbean	Latin America and The Caribbean	Latin America and the Caribbean	laca	Caribbean	Americas	Latin America and the Caribbean	Caribbean	Developing	SIDS			Non-Annex I	IV			Upper middle
DOM	214	R5LAM	Latin America and Caribbean	R10LAM	R10LATIN_AM	Latin America and Caribbean	Latin America and the Caribbean	Latin America and The Caribbean	Latin America and the Caribbean	laca	Caribbean	Americas	Latin America and the Caribbean	Caribbean	Developing	SIDS			Non-Annex I	IV			Upper middle
ECU	218	R5LAM	Latin America and Caribbean	R10LAM	R10LATIN_AM	Latin America and Caribbean	Latin America and the Caribbean	Latin America and The Caribbean	Latin America and the Caribbean	laca	South America	Americas	Latin America and the Caribbean	South America	Developing				Non-Annex I	III			Upper middle
GLP	312	R5LAM	Latin America and Caribbean	R10LAM	R10LATIN_AM	Latin America and Caribbean	Latin America and the Caribbean	Latin America and The Caribbean	Latin America and the Caribbean	laca	Caribbean	Americas	Latin America and the Caribbean	Caribbean	Developing				Territory
GRD	308	R5LAM	Latin America and Caribbean	R10LAM	R10LATIN_AM	Latin America and Caribbean	Latin America and the Caribbean	Latin America and The Caribbean	Latin America and the Caribbean	laca	Caribbean	Americas	Latin America and the Caribbean	Caribbean	Developing	SIDS			Non-Annex I	IV			Upper middle
GTM	320	R5LAM	Latin America and Caribbean	R10LAM	R10LATIN_AM	Latin America and Caribbean	Latin America and the Caribbean	Latin America and The Caribbean	Latin America and the Caribbean	laca	Meso America	Americas	Latin America and the Caribbean	Central America	Developing				Non-Annex I	IV			Upper middle
GUY	328	R5LAM	Latin America and Caribbean	R10LAM	R10LATIN_AM	Latin America and Caribbean	Latin America and the Caribbean	Latin America and The Caribbean	Latin America and the Caribbean	laca	South America	Americas	Latin America and the Caribbean	South America	Developing	SIDS			Non-Annex I	III			Upper middle
HND	340	R5LAM	Latin America and Caribbean	R10LAM	R10LATIN_AM	Latin America and Caribbean	Latin America and the Caribbean	Latin America and The Caribbean	Latin America and the Caribbean	laca	Meso America	Americas	Latin America and the Caribbean	Central America	Developing				Non-Annex I	IV			Lower-middle
HTI	332	R5LAM	Latin America and Caribbean	R10LAM	R10LATIN_AM	Latin America and Caribbean	Latin America and the Caribbean	Latin America and The Caribbean	Latin America and the Caribbean	laca	Caribbean	Americas	Latin America and the Caribbean	Caribbean	Developing	SIDS		LDC	Non-Annex I	IV			Lower-middle
JAM	388	R5LAM	Latin America and Caribbean	R10LAM	R10LATIN_AM	Latin America and Caribbean	Latin America and the Caribbean	Latin America and The Caribbean	Latin America and the Caribbean	laca	Caribbean	Americas	Latin America and the Caribbean	Caribbean	Developing	SIDS			Non-Annex I	IV			Upper middle
MEX	484	R5LAM	Latin America and Caribbean	R10LAM	R10LATIN_AM	Latin America and Caribbean	Latin America and the Caribbean	Latin America and The Caribbean	Latin America and the Caribbean	laca	Meso America	Americas	Latin America and the Caribbean	Central America	Developing				Non-Annex I	IV		OECD	Upper middle
MTQ	474	R5LAM	Latin America and Caribbean	R10LAM	R10LATIN_AM	Latin America and Caribbean	Latin America and the Caribbean	Latin America and The Caribbean	Latin America and the Caribbean	laca	Caribbean	Americas	Latin America and the Caribbean	Caribbean	Developing				Territory
NIC	558	R5LAM	Latin America and Caribbean	R10LAM	R10LATIN_AM	Latin America and Caribbean	Latin America and the Caribbean	Latin America and The Caribbean	Latin America and the Caribbean	laca	Meso America	Americas	Latin America and the Caribbean	Central America	Developing				Non-Annex I	IV			Lower-middle
PAN	591	R5LAM	Latin America and Caribbean	R10LAM	R10LATIN_AM	Latin America and Caribbean	Latin America and the Caribbean	Latin America and The Caribbean	Latin America and the Caribbean	laca	Meso America	Americas	Latin America and the Caribbean	Central America	Developing				Non-Annex I	IV			Upper middle
PER	604	R5LAM	Latin America and Caribbean	R10LAM	R10LATIN_AM	Latin America and Caribbean	Latin America and the Caribbean	Latin America and The Caribbean	Latin America and the Caribbean	laca	South America	Americas	Latin America and the Caribbean	South America	Developing				Non-Annex I	III			Upper middle
PRI	630	R5OECD90+EU	Latin America and Caribbean	R10LAM	R10LATIN_AM	Latin America and Caribbean	North America	North America	Latin America and the Caribbean	laca	Caribbean	Americas	Latin America and the Caribbean	Caribbean	Developing	SIDS			Territory				High
PRY	600	R5LAM	Latin America and Caribbean	R10LAM	R10LATIN_AM	Latin America and Caribbean	Latin America and the Caribbean	Latin America and The Caribbean	Latin America and the Caribbean	laca	South America	Americas	Latin America and the Caribbean	South America	Developing		LLDC		Non-Annex I	III			Upper middle
SLV	222	R5LAM	Latin America and Caribbean	R10LAM	R10LATIN_AM	Latin America and Caribbean	Latin America and the Caribbean	Latin America and The Caribbean	Latin America and the Caribbean	laca	Meso America	Americas	Latin America and the Caribbean	Central America	Developing				Non-Annex I	IV			Lower-middle
SUR	740	R5LAM	Latin America and Caribbean	R10LAM	R10LATIN_AM	Latin America and Caribbean	Latin America and the Caribbean	Latin America and The Caribbean	Latin America and the Caribbean	laca	South America	Americas	Latin America and the Caribbean	South America	Developing	SIDS			Non-Annex I	III			Upper middle
TTO	780	R5LAM	Latin America and Caribbean	R10LAM	R10LATIN_AM	Latin America and Caribbean	Latin America and the Caribbean	Latin America and The Caribbean	Latin America and the Caribbean	laca	Caribbean	Americas	Latin America and the Caribbean	Caribbean	Developing	SIDS			Non-Annex I	IV			High
URY	858	R5LAM	Latin America and Caribbean	R10LAM	R10LATIN_AM	Latin America and Caribbean	Latin America and the Caribbean	Latin America and The Caribbean	Latin America and the Caribbean	laca	South America	Americas	Latin America and the Caribbean	South America	Developing				Non-Annex I	III			High
VEN	862	R5LAM	Latin America and Caribbean	R10LAM	R10LATIN_AM	Latin America and Caribbean	Latin America and the Caribbean	Latin America and The Caribbean	Latin America and the Caribbean	laca	South America	Americas	Latin America and the Caribbean	South America	Developing				Non-Annex I	III			Upper middle
ARE	784	R5MAF	Middle East	R10AFRMEA	R10MIDDLE_EAST	Middle East	Middle East and North Africa	Middle East and North Africa	Middle East, North Africa, Central Asia	mena	Middle East	Asia	Western Asia	Western Asia	Developing				Non-Annex I	II			High
BHR	48	R5MAF	Middle East	R10AFRMEA	R10MIDDLE_EAST	Middle East	Middle East and North Africa	Middle East and North Africa	Middle East, North Africa, Central Asia	mena	Middle East	Asia	Western Asia	Western Asia	Developing				Non-Annex I	II			High
IRN	364	R5MAF	Middle East	R10AFRMEA	R10MIDDLE_EAST	Middle East	Middle East and North Africa	Middle East and North Africa	Middle East, North Africa, Central Asia	mena	Middle East	Asia	Southern Asia	Southern Asia	Developing				Non-Annex I	II			Lower-middle
IRQ	368	R5MAF	Middle East	R10AFRMEA	R10MIDDLE_EAST	Middle East	Middle East and North Africa	Middle East and North Africa	Middle East, North Africa, Central Asia	mena	Middle East	Asia	Western Asia	Western Asia	Developing				Non-Annex I	II			Upper middle
ISR	376	R5MAF	Middle East	R10AFRMEA	R10MIDDLE_EAST	Middle East	Middle East and North Africa	Middle East and North Africa	Middle East, North Africa, Central Asia	mena	Middle East	Asia	Western Asia	Western Asia	Developed				Non-Annex I	VI		OECD	High
JOR	400	R5MAF	Middle East	R10AFRMEA	R10MIDDLE_EAST	Middle East	Middle East and North Africa	Middle East and North Africa	Middle East, North Africa, Central Asia	mena	Middle East	Asia	Western Asia	Western Asia	Developing				Non-Annex I	VI			Upper middle
KWT	414	R5MAF	Middle East	R10AFRMEA	R10MIDDLE_EAST	Middle East	Middle East and North Africa	Middle East and North Africa	Middle East, North Africa, Central Asia	mena	Middle East	Asia	Western Asia	Western Asia	Developing				Non-Annex I	II			High
LBN	422	R5MAF	Middle East	R10AFRMEA	R10MIDDLE_EAST	Middle East	Middle East and North Africa	Middle East and North Africa	Middle East, North Africa, Central Asia	mena	Middle East	Asia	Western Asia	Western Asia	Developing				Non-Annex I	VI			Upper middle
OMN	512	R5MAF	Middle East	R10AFRMEA	R10MIDDLE_EAST	Middle East	Middle East and North Africa	Middle East and North Africa	Middle East, North Africa, Central Asia	mena	Middle East	Asia	Western Asia	Western Asia	Developing				Non-Annex I	II			High
PSE	275	R5MAF	Middle East	R10AFRMEA	R10MIDDLE_EAST	Middle East	Middle East and North Africa	Middle East and North Africa	Middle East, North Africa, Central Asia	mena	Middle East	Asia	Western Asia	Western Asia	Developing				Non-Annex I				Lower-middle
QAT	634	R5MAF	Middle East	R10AFRMEA	R10MIDDLE_EAST	Middle East	Middle East and North Africa	Middle East and North Africa	Middle East, North Africa, Central Asia	mena	Middle East	Asia	Western Asia	Western Asia	Developing				Non-Annex I	II			High
SAU	682	R5MAF	Middle East	R10AFRMEA	R10MIDDLE_EAST	Middle East	Middle East and North Africa	Middle East and North Africa	Middle East, North Africa, Central Asia	mena	Middle East	Asia	Western Asia	Western Asia	Developing				Non-Annex I	II			High
SYR	760	R5MAF	Middle East	R10AFRMEA	R10MIDDLE_EAST	Middle East	Middle East and North Africa	Middle East and North Africa	Middle East, North Africa, Central Asia	mena	Middle East	Asia	Western Asia	Western Asia	Developing				Non-Annex I	VI			Low
YEM	887	R5MAF	Middle East	R10AFRMEA	R10MIDDLE_EAST	Middle East	Middle East and North Africa	Middle East and North Africa	Middle East, North Africa, Central Asia	mena	Middle East	Asia	Western Asia	Western Asia	Developing			LDC	Non-Annex I	II			Low
CAN	124	R5OECD90+EU	Developed Countries	R10NAM	R10NORTH_AM	North America	North America	North America	Canada, NZ, Australia	cajaz	USA & Canada	Americas	Northern America	Northern America	Developed				Annex I	IV		OECD	High
GUM	316	R5OECD90+EU	Asia and developing Pacific	R10NAM	R10NORTH_AM	South-East Asia and developing Pacific	North America	North America	Other Asia	easia	Developing Pacific	Oceania	Micronesia	Micronesia	Developing	SIDS			Territory				High
USA	840	R5OECD90+EU	Developed Countries	R10NAM	R10NORTH_AM	North America	North America	North America	United States of America	usa	USA & Canada	Americas	Northern America	Northern America	Developed				Annex I	IV		OECD	High
AUS	36	R5OECD90+EU	Developed Countries	R10PAO	R10PAC_OECD	Asia-Pacific Developed	Pacific OECD	Pacific OECD	Canada, NZ, Australia	kosau	Australia & New Zealand	Oceania	Australia and New Zealand	Australia and New Zealand	Developed				Annex I	V		OECD	High
JPN	392	R5OECD90+EU	Developed Countries	R10PAO	R10PAC_OECD	Asia-Pacific Developed	Pacific OECD	Pacific OECD	Japan	cajaz	Asia-Pacific Developed (others)	Asia	Eastern Asia	Eastern Asia	Developed				Annex I	II		OECD	High
NZL	554	R5OECD90+EU	Developed Countries	R10PAO	R10PAC_OECD	Asia-Pacific Developed	Pacific OECD	Pacific OECD	Canada, NZ, Australia	cajaz	Australia & New Zealand	Oceania	Australia and New Zealand	Australia and New Zealand	Developed				Annex I	V		OECD	High
ARM	51	R5REF	Eastern Europe and West-Central Asia	R10FSU	R10REF_ECON	Eastern Europe and West-Central Asia	Former Soviet Union	Former Soviet Union	Countries from the Reforming Economies of the Former Soviet Union	te	Eastern Europe and West-Central Asia	Asia	Western Asia	Western Asia	Developing		LLDC		Non-Annex I	VI			Upper middle
AZE	31	R5REF	Eastern Europe and West-Central Asia	R10FSU	R10REF_ECON	Eastern Europe and West-Central Asia	Former Soviet Union	Former Soviet Union	Countries from the Reforming Economies of the Former Soviet Union	te	Eastern Europe and West-Central Asia	Asia	Western Asia	Western Asia	Developing		LLDC		Non-Annex I	VI			Upper middle
BLR	112	R5REF	Eastern Europe and West-Central Asia	R10FSU	R10REF_ECON	Eastern Europe and West-Central Asia	Former Soviet Union	Former Soviet Union	Countries from the Reforming Economies of the Former Soviet Union	te	Eastern Europe and West-Central Asia	Europe	Eastern Europe	Eastern Europe	Developed				Annex I	VI			Upper middle
GEO	268	R5REF	Eastern Europe and West-Central Asia	R10FSU	R10REF_ECON	Eastern Europe and West-Central Asia	Former Soviet Union	Former Soviet Union	Countries from the Reforming Economies of the Former Soviet Union	te	Eastern Europe and West-Central Asia	Asia	Western Asia	Western Asia	Developing				Non-Annex I	VI			Upper middle
KAZ	398	R5REF	Eastern Europe and West-Central Asia	R10FSU	R10REF_ECON	Eastern Europe and West-Central Asia	Former Soviet Union	Former Soviet Union	Countries from the Reforming Economies of the Former Soviet Union	te	Eastern Europe and West-Central Asia	Asia	Central Asia	Central Asia	Developing		LLDC		Non-Annex I	II			Upper middle
KGZ	417	R5REF	Eastern Europe and West-Central Asia	R10FSU	R10REF_ECON	Eastern Europe and West-Central Asia	Former Soviet Union	Former Soviet Union	Countries from the Reforming Economies of the Former Soviet Union	te	Eastern Europe and West-Central Asia	Asia	Central Asia	Central Asia	Developing		LLDC		Non-Annex I	II			Lower-middle
MDA	498	R5REF	Eastern Europe and West-Central Asia	R10FSU	R10REF_ECON	Eastern Europe and West-Central Asia	Former Soviet Union	Former Soviet Union	Countries from the Reforming Economies of the Former Soviet Union	te	Eastern Europe and West-Central Asia	Europe	Eastern Europe	Eastern Europe	Developed		LLDC		Non-Annex I	VI			Upper middle
RUS	643	R5REF	Eastern Europe and West-Central Asia	R10FSU	R10REF_ECON	Eastern Europe and West-Central Asia	Former Soviet Union	Former Soviet Union	Countries from the Reforming Economies of the Former Soviet Union	te	Eastern Europe and West-Central Asia	Europe	Eastern Europe	Eastern Europe	Developed				Annex I	VI			Upper middle
TJK	762	R5REF	Eastern Europe and West-Central Asia	R10FSU	R10REF_ECON	Eastern Europe and West-Central Asia	Former Soviet Union	Former Soviet Union	Countries from the Reforming Economies of the Former Soviet Union	te	Eastern Europe and West-Central Asia	Asia	Central Asia	Central Asia	Developing		LLDC		Non-Annex I	II			Lower-middle
TKM	795	R5REF	Eastern Europe and West-Central Asia	R10FSU	R10REF_ECON	Eastern Europe and West-Central Asia	Former Soviet Union	Former Soviet Union	Countries from the Reforming Economies of the Former Soviet Union	te	Eastern Europe and West-Central Asia	Asia	Central Asia	Central Asia	Developing		LLDC		Non-Annex I	II			Upper middle
UKR	804	R5REF	Developed Countries	R10FSU	R10REF_ECON	Eastern Europe and West-Central Asia	Former Soviet Union	Former Soviet Union	Countries from the Reforming Economies of the Former Soviet Union	te	Eastern Europe and West-Central Asia	Europe	Eastern Europe	Eastern Europe	Developed				Annex I	VI			Lower-middle
UZB	860	R5REF	Eastern Europe and West-Central Asia	R10FSU	R10REF_ECON	Eastern Europe and West-Central Asia	Former Soviet Union	Former Soviet Union	Countries from the Reforming Economies of the Former Soviet Union	te	Eastern Europe and West-Central Asia	Asia	Central Asia	Central Asia	Developing		LLDC		Non-Annex I	II			Lower-middle
BRN	96	R5ASIA	Asia and developing Pacific	R10EASPAS	R10REST_ASIA	South-East Asia and developing Pacific	Other Pacific Asia	Other Pacific Asia	Other Asia	easia	South-East Asia	Asia	South-Eastern Asia	South-Eastern Asia	Developing				Non-Annex I	V			High
FJI	242	R5ASIA	Asia and developing Pacific	R10EASPAS	R10REST_ASIA	South-East Asia and developing Pacific	Other Pacific Asia	Other Pacific Asia	Other Asia	easia	Developing Pacific	Oceania	Melanesia	Melanesia	Developing	SIDS			Non-Annex I	V			Upper middle
FSM	583	R5ASIA	Asia and developing Pacific	R10EASPAS	R10REST_ASIA	South-East Asia and developing Pacific	Other Pacific Asia	Other Pacific Asia	Other Asia	easia	Developing Pacific	Oceania	Micronesia	Micronesia	Developing	SIDS			Non-Annex I	V			Lower-middle
IDN	360	R5ASIA	Asia and developing Pacific	R10EASPAS	R10REST_ASIA	South-East Asia and developing Pacific	Other Pacific Asia	Other Pacific Asia	Other Asia	easia	South-East Asia	Asia	South-Eastern Asia	South-Eastern Asia	Developing				Non-Annex I	V			Lower-middle
KOR	410	R5ASIA	Asia and developing Pacific	R10EASPAS	R10REST_ASIA	Eastern Asia	Other Pacific Asia	Other Pacific Asia	Other Asia	kosau	Eastern Asia	Asia	Eastern Asia	Eastern Asia	Developing				Non-Annex I	II		OECD	High
MYS	458	R5ASIA	Asia and developing Pacific	R10EASPAS	R10REST_ASIA	South-East Asia and developing Pacific	Other Pacific Asia	Other Pacific Asia	Other Asia	easia	South-East Asia	Asia	South-Eastern Asia	South-Eastern Asia	Developing				Non-Annex I	V			Upper middle
NCL	540	R5ASIA	Asia and developing Pacific	R10EASPAS	R10REST_ASIA	South-East Asia and developing Pacific	Other Pacific Asia	Other Pacific Asia	Other Asia	easia	Developing Pacific	Oceania	Melanesia	Melanesia	Developing	SIDS			Territory				High
PHL	608	R5ASIA	Asia and developing Pacific	R10EASPAS	R10REST_ASIA	South-East Asia and developing Pacific	Other Pacific Asia	Other Pacific Asia	Other Asia	easia	South-East Asia	Asia	South-Eastern Asia	South-Eastern Asia	Developing				Non-Annex I	V			Lower-middle
PNG	598	R5ASIA	Asia and developing Pacific	R10EASPAS	R10REST_ASIA	South-East Asia and developing Pacific	Other Pacific Asia	Other Pacific Asia	Other Asia	easia	Developing Pacific	Oceania	Melanesia	Melanesia	Developing	SIDS			Non-Annex I	V			Lower-middle
PYF	258	R5ASIA	Asia and developing Pacific	R10EASPAS	R10REST_ASIA	South-East Asia and developing Pacific	Other Pacific Asia	Other Pacific Asia	Other Asia	easia	Developing Pacific	Oceania	Polynesia	Polynesia	Developing	SIDS			Territory				High
SGP	702	R5ASIA	Asia and developing Pacific	R10EASPAS	R10REST_ASIA	South-East Asia and developing Pacific	Other Pacific Asia	Other Pacific Asia	Other Asia	easia	South-East Asia	Asia	South-Eastern Asia	South-Eastern Asia	Developing	SIDS			Non-Annex I	V			High
SLB	90	R5ASIA	Asia and developing Pacific	R10EASPAS	R10REST_ASIA	South-East Asia and developing Pacific	Other Pacific Asia	Other Pacific Asia	Other Asia	easia	Developing Pacific	Oceania	Melanesia	Melanesia	Developing	SIDS		LDC	Non-Annex I	V			Lower-middle
THA	764	R5ASIA	Asia and developing Pacific	R10EASPAS	R10REST_ASIA	South-East Asia and developing Pacific	Other Pacific Asia	Other Pacific Asia	Other Asia	easia	South-East Asia	Asia	South-Eastern Asia	South-Eastern Asia	Developing				Non-Annex I	II			Upper middle
TLS	626	R5ASIA	Asia and developing Pacific	R10EASPAS	R10REST_ASIA	South-East Asia and developing Pacific	Other Pacific Asia	Other Pacific Asia	Other Asia	easia	South-East Asia	Asia	South-Eastern Asia	South-Eastern Asia	Developing	SIDS		LDC	Non-Annex I	V			Lower-middle
TWN		R5ASIA	Asia and developing Pacific	R10EASPAS	R10REST_ASIA	Eastern Asia	Other Pacific Asia	Other Pacific Asia	China	china	Eastern Asia	Asia	Eastern Asia	Eastern Asia	Developing				Territory				High
VUT	548	R5ASIA	Asia and developing Pacific	R10EASPAS	R10REST_ASIA	South-East Asia and developing Pacific	Other Pacific Asia	Other Pacific Asia	Other Asia	easia	Developing Pacific	Oceania	Melanesia	Melanesia	Developing	SIDS			Non-Annex I	V			Lower-middle
WSM	882	R5ASIA	Asia and developing Pacific	R10EASPAS	R10REST_ASIA	South-East Asia and developing Pacific	Other Pacific Asia	Other Pacific Asia	Other Asia	easia	Developing Pacific	Oceania	Polynesia	Polynesia	Developing	SIDS			Non-Annex I	V			Lower-middle
ABW	533	R5LAM	Latin America and Caribbean	R10LAM		Latin America and Caribbean	Latin America and the Caribbean	Latin America and The Caribbean	Latin America and the Caribbean	laca	Caribbean	Americas	Latin America and the Caribbean	Caribbean	Developing	SIDS			Territory				High
AIA	660		Latin America and Caribbean	R10LAM		Latin America and Caribbean	Latin America and the Caribbean	Latin America and The Caribbean	Latin America and the Caribbean	laca	Caribbean	Americas	Latin America and the Caribbean	Caribbean	Developing	SIDS			Territory
ALA	248		Developed Countries	R10EUR		Europe	Europe		EU 28	europe	Northern and western Europe	Europe	Northern Europe	Northern Europe	Developed				Territory
ALB	8	R5OECD90+EU	Developed Countries	R10EUR		Europe	Europe	Central and Eastern Europe	Non-EU28 Europe	te	Southern and eastern Europe	Europe	Southern Europe	Southern Europe	Developed				Non-Annex I	VI			Upper middle
AND	20		Developed Countries	R10EUR		Europe	Europe	Western Europe	Non-EU28 Europe	europe	Southern and eastern Europe	Europe	Southern Europe	Southern Europe	Developed				Non-Annex I	VI			High
ASM	16		Asia and developing Pacific	R10EASPAS		South-East Asia and developing Pacific	Other Pacific Asia	Other Pacific Asia	Other Asia	easia	Developing Pacific	Oceania	Polynesia	Polynesia	Developing	SIDS			Territory				Upper middle
ATF	260		Africa	R10AFRMEA		Africa			Other Asia	ssa	Eastern Africa	Africa	Sub-Saharan Africa	Eastern Africa	Developing				Territory
ATG	28		Latin America and Caribbean	R10LAM		Latin America and Caribbean	Latin America and the Caribbean	Latin America and The Caribbean	Latin America and the Caribbean	laca	Caribbean	Americas	Latin America and the Caribbean	Caribbean	Developing	SIDS			Non-Annex I	IV			High
BES	535		Latin America and Caribbean	R10LAM		Latin America and Caribbean		Latin America and The Caribbean	Latin America and the Caribbean	laca	Caribbean	Americas	Latin America and the Caribbean	Caribbean	Developing	SIDS			Territory
BLM	652		Latin America and Caribbean	R10LAM		Latin America and Caribbean	Europe		Latin America and the Caribbean	laca	Caribbean	Americas	Latin America and the Caribbean	Caribbean	Developing				Territory
BMU	60		Developed Countries	R10LAM		North America	Latin America and the Caribbean	Latin America and The Caribbean	Latin America and the Caribbean	laca	Greenland, Bermuda + others	Americas	Northern America	Northern America	Developed				Territory				High
BVT	74		Latin America and Caribbean	R10LAM		Latin America and Caribbean			Latin America and the Caribbean	ssa	South America	Americas	Latin America and the Caribbean	South America	Developing				Territory
CCK	166		Developed Countries	R10PAO		Asia-Pacific Developed	Other Pacific Asia	Other Pacific Asia	Other Asia	easia	Asia-Pacific Developed (others)	Oceania	Australia and New Zealand	Australia and New Zealand	Developed				Territory
COK	184		Asia and developing Pacific	R10EASPAS		South-East Asia and developing Pacific	Other Pacific Asia	Other Pacific Asia	Other Asia	cajaz	Developing Pacific	Oceania	Polynesia	Polynesia	Developing	SIDS			Non-Annex I	V
CUW	531		Latin America and Caribbean	R10LAM		Latin America and Caribbean		Latin America and The Caribbean	Latin America and the Caribbean	laca	Caribbean	Americas	Latin America and the Caribbean	Caribbean	Developing	SIDS			Territory				High
CXR	162		Developed Countries	R10PAO		Asia-Pacific Developed	Pacific OECD	Other Pacific Asia	Other Asia	kosau	Asia-Pacific Developed (others)	Oceania	Australia and New Zealand	Australia and New Zealand	Developed				Territory
CYM	136		Latin America and Caribbean	R10LAM		Latin America and Caribbean	Latin America and the Caribbean	Latin America and The Caribbean	Latin America and the Caribbean	laca	Caribbean	Americas	Latin America and the Caribbean	Caribbean	Developing				Territory				High
CZE	203	R5OECD90+EU	Developed Countries	R10EUR		Europe	Europe	Central and Eastern Europe	EU 28	europe	Southern and eastern Europe	Europe	Eastern Europe	Eastern Europe	Developed				Annex I	VI	EU	OECD	High
DMA	212		Latin America and Caribbean	R10LAM		Latin America and Caribbean	Latin America and the Caribbean	Latin America and The Caribbean	Latin America and the Caribbean	laca	Caribbean	Americas	Latin America and the Caribbean	Caribbean	Developing	SIDS			Non-Annex I	IV			Upper middle
FLK	238		Latin America and Caribbean	R10LAM		Latin America and Caribbean	Latin America and the Caribbean	Latin America and The Caribbean	Latin America and the Caribbean	laca	South America	Americas	Latin America and the Caribbean	South America	Developing				Territory
FRO	234		Developed Countries	R10EUR		Europe	Europe	Western Europe	EU 28	europe	Northern and western Europe	Europe	Northern Europe	Northern Europe	Developed				Territory				High
GGY	831		Developed Countries	R10EUR		Europe	Europe		EU 28	europe	Northern and western Europe	Europe	Northern Europe	Channel Islands	Developed				Territory				High
GIB	292		Developed Countries	R10EUR		Europe	Europe	Western Europe	EU 28	europe	Southern and eastern Europe	Europe	Southern Europe	Southern Europe	Developed				Territory				High
GRL	304		Developed Countries	R10EUR		North America	Europe	Western Europe	Non-EU28 Europe	europe	Greenland, Bermuda + others	Americas	Northern America	Northern America	Developed				Territory				High
GUF	254	R5LAM	Latin America and Caribbean	R10LAM		Latin America and Caribbean	Latin America and the Caribbean	Latin America and The Caribbean	Latin America and the Caribbean	laca	South America	Americas	Latin America and the Caribbean	South America	Developing				Territory
HMD	334		Developed Countries	R10PAO		Asia-Pacific Developed	Pacific OECD		Canada, NZ, Australia	kosau	Asia-Pacific Developed (others)	Oceania	Australia and New Zealand	Australia and New Zealand	Developed				Territory
IMN	833		Developed Countries	R10EUR		Europe	Europe	Western Europe	EU 28	europe	Northern and western Europe	Europe	Northern Europe	Northern Europe	Developed				Territory				High
IOT	86		Africa	R10AFRMEA		Africa	Europe		Other Asia	ssa	Eastern Africa	Africa	Sub-Saharan Africa	Eastern Africa	Developing				Territory
JEY	832		Developed Countries	R10EUR		Europe	Europe		EU 28	europe	Northern and western Europe	Europe	Northern Europe	Channel Islands	Developed				Territory				High
KIR	296		Asia and developing Pacific	R10EASPAS		South-East Asia and developing Pacific	Other Pacific Asia	Other Pacific Asia	Other Asia	easia	Developing Pacific	Oceania	Micronesia	Micronesia	Developing	SIDS		LDC	Non-Annex I	V			Lower-middle
KNA	659		Latin America and Caribbean	R10LAM		Latin America and Caribbean	Latin America and the Caribbean	Latin America and The Caribbean	Latin America and the Caribbean	laca	Caribbean	Americas	Latin America and the Caribbean	Caribbean	Developing	SIDS			Non-Annex I	IV			High
LCA	662		Latin America and Caribbean	R10LAM		Latin America and Caribbean	Latin America and the Caribbean	Latin America and The Caribbean	Latin America and the Caribbean	laca	Caribbean	Americas	Latin America and the Caribbean	Caribbean	Developing	SIDS			Non-Annex I	IV			Upper middle
LIE	438		Developed Countries	R10EUR		Europe	Europe	Western Europe	Non-EU28 Europe	europe	Northern and western Europe	Europe	Western Europe	Western Europe	Developed				Annex I	VI			High
MAF	663		Latin America and Caribbean	R10LAM		Latin America and Caribbean	Europe		Latin America and the Caribbean	laca	Caribbean	Americas	Latin America and the Caribbean	Caribbean	Developing				Territory				High
MCO	492		Developed Countries	R10EUR		Europe	Europe	Western Europe	Non-EU28 Europe	europe	Northern and western Europe	Europe	Western Europe	Western Europe	Developed				Annex I	VI			High
MHL	584		Asia and developing Pacific	R10EASPAS		South-East Asia and developing Pacific	Other Pacific Asia	Other Pacific Asia	Other Asia	easia	Developing Pacific	Oceania	Micronesia	Micronesia	Developing	SIDS			Non-Annex I	V			Upper middle
MNP	580		Asia and developing Pacific	R10EASPAS		South-East Asia and developing Pacific	Other Pacific Asia	Other Pacific Asia	Other Asia	easia	Developing Pacific	Oceania	Micronesia	Micronesia	Developing	SIDS			Territory				High
MSR	500		Latin America and Caribbean	R10LAM		Latin America and Caribbean	Latin America and the Caribbean	Latin America and The Caribbean	Latin America and the Caribbean	laca	Caribbean	Americas	Latin America and the Caribbean	Caribbean	Developing	SIDS			Territory
NFK	574		Developed Countries	R10PAO		Asia-Pacific Developed	Europe	Other Pacific Asia	Other Asia	kosau	Asia-Pacific Developed (others)	Oceania	Australia and New Zealand	Australia and New Zealand	Developed				Territory
NIU	570		Asia and developing Pacific	R10EASPAS		South-East Asia and developing Pacific	Other Pacific Asia	Other Pacific Asia	Other Asia	cajaz	Developing Pacific	Oceania	Polynesia	Polynesia	Developing	SIDS			Non-Annex I	V
NRU	520		Asia and developing Pacific	R10EASPAS		South-East Asia and developing Pacific	Other Pacific Asia	Other Pacific Asia	Other Asia	kosau	Developing Pacific	Oceania	Micronesia	Micronesia	Developing	SIDS			Non-Annex I	V			High
PCN	612		Asia and developing Pacific	R10EASPAS		South-East Asia and developing Pacific	Europe	Other Pacific Asia	Other Asia	cajaz	Developing Pacific	Oceania	Polynesia	Polynesia	Developing				Territory
PLW	585		Asia and developing Pacific	R10EASPAS		South-East Asia and developing Pacific	Other Pacific Asia	Other Pacific Asia	Other Asia	easia	Developing Pacific	Oceania	Micronesia	Micronesia	Developing	SIDS			Non-Annex I	V			High
SGS	239		Latin America and Caribbean	R10LAM		Latin America and Caribbean	Europe		Latin America and the Caribbean	laca	South America	Americas	Latin America and the Caribbean	South America	Developing				Territory
SHN	654		Africa	R10AFRMEA		Africa	Europe	Sub-Saharan Africa	Sub-saharan Africa	ssa	Western Africa	Africa	Sub-Saharan Africa	Western Africa	Developing				Territory
SJM	744		Developed Countries	R10EUR		Europe	Europe	Western Europe	Non-EU28 Europe	europe	Northern and western Europe	Europe	Northern Europe	Northern Europe	Developed				Territory
SMR	674		Developed Countries	R10EUR		Europe	Europe	Western Europe	Non-EU28 Europe	europe	Southern and eastern Europe	Europe	Southern Europe	Southern Europe	Developed				Non-Annex I	VI			High
SPM	666		Developed Countries	R10LAM		North America	Europe	North America	Canada, NZ, Australia	europe	Greenland, Bermuda + others	Americas	Northern America	Northern America	Developed				Territory
SXM	534		Latin America and Caribbean	R10LAM		Latin America and Caribbean		Latin America and The Caribbean	Latin America and the Caribbean	laca	Caribbean	Americas	Latin America and the Caribbean	Caribbean	Developing	SIDS			Territory				High
SYC	690		Africa	R10AFRMEA		Africa	Sub-saharan Africa	Sub-Saharan Africa	Sub-saharan Africa	ssa	Eastern Africa	Africa	Sub-Saharan Africa	Eastern Africa	Developing	SIDS			Non-Annex I	I			High
TCA	796		Latin America and Caribbean	R10LAM		Latin America and Caribbean	Latin America and the Caribbean	Latin America and The Caribbean	Latin America and the Caribbean	laca	Caribbean	Americas	Latin America and the Caribbean	Caribbean	Developing				Territory				High
TKL	772		Asia and developing Pacific	R10EASPAS		South-East Asia and developing Pacific	Pacific OECD	Other Pacific Asia	Other Asia	cajaz	Developing Pacific	Oceania	Polynesia	Polynesia	Developing				Territory
TON	776		Asia and developing Pacific	R10EASPAS		South-East Asia and developing Pacific	Other Pacific Asia	Other Pacific Asia	Other Asia	easia	Developing Pacific	Oceania	Polynesia	Polynesia	Developing	SIDS			Non-Annex I	V			Upper middle
TUV	798		Asia and developing Pacific	R10EASPAS		South-East Asia and developing Pacific	Other Pacific Asia	Other Pacific Asia	Other Asia	cajaz	Developing Pacific	Oceania	Polynesia	Polynesia	Developing	SIDS		LDC	Non-Annex I	V			Upper middle
UMI	581		Asia and developing Pacific	R10EASPAS		South-East Asia and developing Pacific	North America		Other Asia	cajaz	Developing Pacific	Oceania	Micronesia	Micronesia	Developing				Territory
VAT	336		Developed Countries	R10EUR		Europe	Europe	Western Europe	Non-EU28 Europe	europe	Southern and eastern Europe	Europe	Southern Europe	Southern Europe	Developed				Territory
VCT	670		Latin America and Caribbean	R10LAM		Latin America and Caribbean	Latin America and the Caribbean	Latin America and The Caribbean	Latin America and the Caribbean	laca	Caribbean	Americas	Latin America and the Caribbean	Caribbean	Developing	SIDS			Non-Annex I	IV			Upper middle
VGB	92		Latin America and Caribbean	R10LAM		Latin America and Caribbean	Europe	Latin America and The Caribbean	Latin America and the Caribbean	laca	Caribbean	Americas	Latin America and the Caribbean	Caribbean	Developing	SIDS			Territory				High
VIR	850	R5LAM	Latin America and Caribbean	R10LAM		Latin America and Caribbean	North America	North America	Latin America and the Caribbean	laca	Caribbean	Americas	Latin America and the Caribbean	Caribbean	Developing	SIDS			Territory				High
WLF	876		Asia and developing Pacific	R10EASPAS		South-East Asia and developing Pacific	Europe	Other Pacific Asia	Other Asia	cajaz	Developing Pacific	Oceania	Polynesia	Polynesia	Developing				Territory
