# Supplementary material for: Navigating the unexpected: The impact of disruptive events on mitigation scenarios
Source: Research Square preprint supplement (doi:10.21203/rs.3.rs-7427967/v1), 2025-08-29
Supplement: Supplementary file 2 [file c3a480ddec8477bea215db5f.xlsx]

## Sheet: Impact numbers
Source Paper	va Vliet et al 2016
Link	https://www.nature.com/articles/nclimate2903
Supplementary Information	https://static-content.springer.com/esm/art%3A10.1038%2Fnclimate2903/MediaObjects/41558_2016_BFnclimate2903_MOESM362_ESM.pdf
Sources: Tables S4 and S5
	Region	RCP	Year	Relative % change	Relative % change
	Region	RCP	Year	Hydropower	Thermoelectric Power (Fossil fueled, biomass, and nuclear)
	----------------	--------------------------	--------------------------	---------------------	------------------------------
	North America	RCP2.6 (Below 2C EoC)	2020s (i.e. 2020-2039)	-0.001	-0.061
	North America	RCP2.6 (Below 2C EoC)	2050s (i.e. 2040-2069)	0.004	-0.072
	North America	RCP8.5 (Exceeding 4C EoC)	2020s (i.e. 2020-2039)	0.002	-0.054
	North America	RCP8.5 (Exceeding 4C EoC)	2050s (i.e. 2040-2069)	-0.022	-0.13
	South America	RCP2.6 (Below 2C EoC)	2020s (i.e. 2020-2039)	-0.028	-0.013
	South America	RCP2.6 (Below 2C EoC)	2050s (i.e. 2040-2069)	-0.037	-0.026
	South America	RCP8.5 (Exceeding 4C EoC)	2020s (i.e. 2020-2039)	-0.031	-0.019
	South America	RCP8.5 (Exceeding 4C EoC)	2050s (i.e. 2040-2069)	-0.055	-0.065
	Europe	RCP2.6 (Below 2C EoC)	2020s (i.e. 2020-2039)	-0.015	-0.086
	Europe	RCP2.6 (Below 2C EoC)	2050s (i.e. 2040-2069)	-0.001	-0.1
	Europe	RCP8.5 (Exceeding 4C EoC)	2020s (i.e. 2020-2039)	-0.007	-0.082
	Europe	RCP8.5 (Exceeding 4C EoC)	2050s (i.e. 2040-2069)	-0.042	-0.152
	Africa	RCP2.6 (Below 2C EoC)	2020s (i.e. 2020-2039)	0.001	-0.031
	Africa	RCP2.6 (Below 2C EoC)	2050s (i.e. 2040-2069)	-0.009	-0.052
	Africa	RCP8.5 (Exceeding 4C EoC)	2020s (i.e. 2020-2039)	0.004	-0.048
	Africa	RCP8.5 (Exceeding 4C EoC)	2050s (i.e. 2040-2069)	-0.009	-0.178
	Asia	RCP2.6 (Below 2C EoC)	2020s (i.e. 2020-2039)	-0.022	-0.036
	Asia	RCP2.6 (Below 2C EoC)	2050s (i.e. 2040-2069)	-0.009	-0.047
	Asia	RCP8.5 (Exceeding 4C EoC)	2020s (i.e. 2020-2039)	-0.031	-0.032
	Asia	RCP8.5 (Exceeding 4C EoC)	2050s (i.e. 2040-2069)	-0.03	-0.084
	Australia	RCP2.6 (Below 2C EoC)	2020s (i.e. 2020-2039)	-0.104	-0.063
	Australia	RCP2.6 (Below 2C EoC)	2050s (i.e. 2040-2069)	-0.064	-0.048
	Australia	RCP8.5 (Exceeding 4C EoC)	2020s (i.e. 2020-2039)	-0.083	-0.055
	Australia	RCP8.5 (Exceeding 4C EoC)	2050s (i.e. 2040-2069)	-0.164	-0.113
	World	RCP2.6 (Below 2C EoC)	2020s (i.e. 2020-2039)	-0.017	-0.058
	World	RCP2.6 (Below 2C EoC)	2050s (i.e. 2040-2069)	-0.012	-0.07
	World	RCP8.5 (Exceeding 4C EoC)	2020s (i.e. 2020-2039)	-0.019	-0.053
	World	RCP8.5 (Exceeding 4C EoC)	2050s (i.e. 2040-2069)	-0.036	-0.121
	Baseline Capacity Factors Assumption
	hydropower_baseline_cf	0.45
	thermoelectric_baseline_cf	0.75
	Table 3
	Region	RCP	Year	Hydropower Baseline	Thermoelectric Power Baseline (Fossil fueled, biomass, and nuclear)
	----------------	--------------------------	--------------------------	---------------------	------------------------------
	North America	RCP2.6 (Below 2C EoC)	2020s (i.e. 2020-2039)	0.44955	0.70425
	North America	RCP2.6 (Below 2C EoC)	2050s (i.e. 2040-2069)	0.4518	0.696
	North America	RCP8.5 (Exceeding 4C EoC)	2020s (i.e. 2020-2039)	0.4509	0.7095
	North America	RCP8.5 (Exceeding 4C EoC)	2050s (i.e. 2040-2069)	0.4401	0.6525
	South America	RCP2.6 (Below 2C EoC)	2020s (i.e. 2020-2039)	0.4374	0.74025
	South America	RCP2.6 (Below 2C EoC)	2050s (i.e. 2040-2069)	0.43335	0.7305
	South America	RCP8.5 (Exceeding 4C EoC)	2020s (i.e. 2020-2039)	0.43605	0.73575
	South America	RCP8.5 (Exceeding 4C EoC)	2050s (i.e. 2040-2069)	0.42525	0.70125
	Europe	RCP2.6 (Below 2C EoC)	2020s (i.e. 2020-2039)	0.44325	0.6855
	Europe	RCP2.6 (Below 2C EoC)	2050s (i.e. 2040-2069)	0.44955	0.675
	Europe	RCP8.5 (Exceeding 4C EoC)	2020s (i.e. 2020-2039)	0.44685	0.6885
	Europe	RCP8.5 (Exceeding 4C EoC)	2050s (i.e. 2040-2069)	0.4311	0.636
	Africa	RCP2.6 (Below 2C EoC)	2020s (i.e. 2020-2039)	0.45045	0.72675
	Africa	RCP2.6 (Below 2C EoC)	2050s (i.e. 2040-2069)	0.44595	0.711
	Africa	RCP8.5 (Exceeding 4C EoC)	2020s (i.e. 2020-2039)	0.4518	0.714
	Africa	RCP8.5 (Exceeding 4C EoC)	2050s (i.e. 2040-2069)	0.44595	0.6165
	Asia	RCP2.6 (Below 2C EoC)	2020s (i.e. 2020-2039)	0.4401	0.723
	Asia	RCP2.6 (Below 2C EoC)	2050s (i.e. 2040-2069)	0.44595	0.71475
	Asia	RCP8.5 (Exceeding 4C EoC)	2020s (i.e. 2020-2039)	0.43605	0.726
	Asia	RCP8.5 (Exceeding 4C EoC)	2050s (i.e. 2040-2069)	0.4365	0.687
	Australia	RCP2.6 (Below 2C EoC)	2020s (i.e. 2020-2039)	0.4032	0.70275
	Australia	RCP2.6 (Below 2C EoC)	2050s (i.e. 2040-2069)	0.4212	0.714
	Australia	RCP8.5 (Exceeding 4C EoC)	2020s (i.e. 2020-2039)	0.41265	0.70875
	Australia	RCP8.5 (Exceeding 4C EoC)	2050s (i.e. 2040-2069)	0.3762	0.66525
	World	RCP2.6 (Below 2C EoC)	2020s (i.e. 2020-2039)	0.44235	0.7065
	World	RCP2.6 (Below 2C EoC)	2050s (i.e. 2040-2069)	0.4446	0.6975
	World	RCP8.5 (Exceeding 4C EoC)	2020s (i.e. 2020-2039)	0.44145	0.71025
	World	RCP8.5 (Exceeding 4C EoC)	2050s (i.e. 2040-2069)	0.4338	0.65925
